# 1 Axonal stimulation affects the linear summation of 2 single-point perception in three Argus II users

3 Yuchen Hou<sup>1,2</sup>, Devyani Nanduri<sup>3,4</sup>, Jacob Granley<sup>1</sup>, James D.  
4 Weiland<sup>4</sup>, and Michael Beyeler<sup>1,2</sup>

5 <sup>1</sup>Department of Computer Science, University of California, Santa Barbara, CA

6 <sup>2</sup>Department of Psychological & Brain Sciences, University of California, Santa  
7 Barbara, CA

8 <sup>3</sup>Department of Biomedical Engineering, University of Southern California, Los  
9 Angeles, CA

10 <sup>4</sup>Department of Biomedical Engineering, University of Michigan, Ann Arbor, MI

11 E-mail: [yuchenh@ucsb.edu](mailto:yuchenh@ucsb.edu)

12 **Abstract.** *Purpose.* Retinal implants use electrical stimulation to elicit flashes  
13 of light (“phosphenes”). Single-electrode phosphene shape has been shown to vary  
14 systematically with stimulus amplitude and frequency as well as the retinal location of  
15 the stimulating electrode, due to incidental activation of passing nerve fiber bundles.  
16 However, this knowledge has yet to be extended to paired-electrode stimulation.  
17 *Methods.* We retrospectively analyzed 4402 phosphene drawings made by three  
18 blind subjects implanted with an Argus II Retinal Prosthesis. Phosphene shape  
19 (characterized by area, perimeter, major and minor axis length; normalized per  
20 subject) and number of perceived phosphenes were averaged across trials and correlated  
21 with the corresponding single-electrode parameters. In addition, the number of  
22 phosphenes was correlated with stimulus amplitude and neuroanatomical parameters:  
23 electrode-retina (“height”) and electrode-fovea distance (“eccentricity”) as well as the  
24 electrode-electrode distance to (“between-axon”) and along axon bundles (“along-  
25 axon”). Statistical analyses were conducted using linear regression and partial  
26 correlation analysis. *Results.* Simple regression revealed that each paired-electrode  
27 shape descriptor could be predicted by the sum of the two corresponding single-  
28 electrode shape descriptors ( $p < .001$ ). Multiple regression revealed that paired-  
29 electrode phosphene shape was primarily predicted by stimulus amplitude, electrode-  
30 retina distance, and electrode-fovea distance ( $p < .05$ ). Interestingly, the number of  
31 elicited phosphenes increased with between-axon distance ( $\beta = .162, p < .05$ ), but not  
32 with along-axon distance ( $p > .05$ ). *Conclusions.* The shape of phosphenes elicited  
33 by paired-electrode stimulation was well predicted by the shape of their corresponding  
34 single-electrode phosphenes, suggesting that two-point perception can be expressed as  
35 the linear summation of single-point perception. We also found that the number of  
36 perceived phosphenes increased with the between-axon distance of the two electrodes,  
37 providing further evidence in support of the axon map model for epiretinal stimulation.  
38 These findings contribute to the growing literature on phosphene perception and have  
39 important implications for the design of future retinal prostheses.

40 *Keywords:* Retinal prosthesis, phosphene shape, pattern vision

## 41 1. Introduction

42 Retinitis pigmentosa (RP) is an inherited degenerative disease of the eye that is  
43 estimated to affect one in 4,000 individuals worldwide (Hamel, 2006). Although recent  
44 advances in gene and stem cell therapies (e.g., Russell et al., 2017, da Cruz et al., 2018;  
45 for a recent review see McGregor, 2019) as well as retinal sheet transplants (e.g., Foik et  
46 al., 2018, Gasparini et al., 2019; for a recent commentary see Beyeler, 2019) are showing  
47 great promise as near-future treatments for early-stage RP, electronic retinal prostheses  
48 continue to be a pertinent option for later stages of the disease.

49 Retinal prostheses typically acquire visual input via an external camera, which  
50 is then translated into electrical pulses sent to a microstimulator implanted in the  
51 eye (Weiland et al., 2016). The stimulator receives the information, decodes it,  
52 and stimulates the surviving retinal neurons with electrical current, thus evoking the  
53 perception of flashes of light (“phosphenes”). The most widely adopted retinal implant  
54 thus far is the Argus II Retinal Prosthesis System (Vivani Medical, Inc; formerly  
55 Second Sight Medical Products, Inc.), which was the first retinal implant to obtain  
56 regulatory approval in the US and Europe, and has been implanted in roughly 500  
57 patients worldwide (Luo and da Cruz, 2016).

58 A series of papers demonstrated that phosphenes elicited by stimulating a single  
59 Argus II electrode have a distinctive shape that is relatively consistent over time  
60 (Nanduri et al., 2008; Luo et al., 2016; Beyeler et al., 2019). Phosphene shape has  
61 been shown to depend strongly on the retinal location of the stimulating electrode,  
62 predominantly elongated along the trajectory of the underlying nerve fiber bundle  
63 (Rizzo et al., 2003; Beyeler et al., 2019). In addition, phosphene appearance varies  
64 systematically with stimulus amplitude and frequency (Horsager et al., 2009; Nanduri  
65 et al., 2012; Sinclair et al., 2016) to the extent that a simple computational model  
66 can predict phosphene shape across a wide range of stimulus parameters (Granley and  
67 Beyeler, 2021).

68 However, less is known about how phosphenes combine when multiple electrodes  
69 are stimulated. Early research suggested that repeated paired stimulation resulted in  
70 reproducible phosphenes as subjects perceived “similar” phosphenes on 66% of trials  
71 (Rizzo et al., 2003). But more recent studies indicated that phosphenes tend to merge  
72 in nontrivial ways. For instance, Wilke et al. (2011b) highlighted the importance  
73 of electric crosstalk between electrodes in determining the response to simultaneous  
74 stimulation of multiple electrodes. Horsager et al. (2011) found that elicited percepts  
75 were affected by other stimulating electrodes (even after temporally staggering pulses to  
76 remove electric field interactions) and demonstrated a linear combination of threshold  
77 currents for simultaneous stimulation. Using a suprachoroidal prosthesis, Sinclair et al.  
78 (2016) found that bipolar electrode configurations produced percepts that were similar  
79 in appearance to the summation of the phosphenes that were elicited from the two  
80 individual electrodes using a monopolar configuration. Most recently, Yücel et al.  
81 (2022) identified several factors that might limit the spatial resolution of prosthetic

82 vision, which included retinal damage, electrode-retina distance, and the inadvertent  
83 stimulation of nerve fiber bundles. To avoid electric crosstalk and aid the perceptual  
84 merging of multi-electrode phosphenes, some researchers (Beauchamp et al., 2020;  
85 Oswalt et al., 2021; Christie et al., 2022) considered sequential stimulation paradigms.  
86 However, sequential stimulation does not always lead to perceptually intelligible forms  
87 or objects; often subjects are only able to trace an outline of the perceived shape, and  
88 their interpretation of the shape relies heavily on this basic outline (Christie et al.,  
89 2022). Therefore, understanding how multi-electrode stimulation can be leveraged to  
90 produce form vision remains an open challenge for the field of visual prosthetics.

91 Here we aim to study the consistency and predictability of the (presumably)  
92 fundamental building blocks of form vision: the percepts elicited by single- and paired-  
93 electrode stimulation. While single-electrode stimulation is relatively well understood  
94 (Nanduri et al., 2008; Sinclair et al., 2016; Luo et al., 2016; Beyeler et al., 2019;  
95 Granley and Beyeler, 2021), it remains to be demonstrated whether this knowledge can  
96 be extended to predict phosphene appearance elicited by paired-electrode stimulation.  
97 Specifically, the axon map model (Beyeler et al., 2019; Granley and Beyeler, 2021)  
98 predicts that the probability of seeing two phosphenes should increase with increasing  
99 distance between their axon bundles (as opposed to distance on the retinal surface).  
100 To assess whether phosphenes sum linearly, and to determine which neuroanatomical  
101 and stimulus parameters may be predictive of paired-phosphene appearance, we  
102 retrospectively analyzed an extensive psychophysical dataset collected with the help  
103 of three Argus II patients.

## 104 2. Methods

### 105 2.1. Participants

106 This study involved three blind participants (one female and two male) with  
107 severe RP, ranging from 41 to 70 years in age at implantation (Table 1). Subjects  
108 were chronically implanted with the Argus II Retinal Prosthesis System as part of  
109 an interventional feasibility trial ([clinicaltrials.gov](https://clinicaltrials.gov) NCT00407602; completed).  
110 All psychophysical experiments were carried out at least six months after device  
111 implementation. The study was approved by the Institutional Review Board (IRB)  
112 at each subject’s clinical site and was conducted under the tenets of the Declaration of  
113 Helsinki. Informed consent was obtained from the participants after explanation of the  
114 nature and possible consequences of the study.

115 Due to their geographic location, the participants were not directly examined by  
116 the authors of this study. Instead, initial experimental procedures were sent to the  
117 clinical site, and trained field clinical engineers performed the experiments as specified.  
118 Raw collected data was then sent to the authors for subsequent analysis.

| Subject ID | Sex | Pre-op VA | Age range at surgery | Years blind |
|------------|-----|-----------|----------------------|-------------|
| 1          | M   | NLP       | 61-70                | ?           |
| 2          | F   | NLP       | 41-50                | 11-20       |
| 3          | M   | BLP       | 41-50                | 21-30       |

**Table 1:** Subject details: clinical implant site, sex (M: male, F: female), preoperative visual acuity (VA) categorized as either bare light perception (BLP) or no light perception (NLP), the age range at implantation, and the number of years that subjects had been blind prior to implant surgery (self-reported). Years blind for Subject 1 was unknown due to gradual loss of vision.

### 119 2.2. Stimuli

120 Argus II consists of a  $6 \times 10$  grid of platinum disc electrodes, each 200  $\mu\text{m}$  in  
121 diameter, subtending  $0.7^\circ$  of visual angle (Luo and da Cruz, 2016). Electrodes were  
122 spaced 575  $\mu\text{m}$  apart. In day-to-day use, an external component is worn by the user,  
123 consisting of a small camera and transmitter mounted on a pair of glasses. The camera  
124 captures video and sends the information to the visual processing unit (VPU), which  
125 converts it into pulse trains using pre-specific image processing techniques (*camera*  
126 *mode*).

127 All stimuli described in this study were presented in *direct stimulation* mode.  
128 Stimuli were charge-balanced, cathodic-first, square-wave pulse trains with 0.45 ms  
129 phase duration and 250 ms total stimulus duration. Stimulus amplitudes, frequencies,  
130 and the number of stimulated electrodes varied based on the design of each experiment.  
131 Stimuli were programmed in Matlab using custom software, and pulse train parameters

132 (i.e., the electrode(s) to be stimulated, current amplitude, pulse width, inter-pulse  
133 interval, and overall stimulus duration) were sent directly to the VPU, which then  
134 sent the stimulus commands to the internal portion of the implant using an inductive  
135 coil link. The implanted receiver wirelessly received these data and sent the signals to  
136 the electrode array via a small cable.

### 137 *2.3. Psychophysical methods*

138 Perceptual thresholds for individual electrodes were measured using an adaptive  
139 yes/no procedure implemented using custom software (see Appendix A).

140 Participants were asked to perform a drawing task upon electrical stimulation of the  
141 retina. Subjects were comfortably seated in front of a touchscreen monitor whose center  
142 was horizontally aligned with the subject's head. The distance between the subject's  
143 eyes and the monitor was 83.8 cm for Subject 1, 76.2 cm for Subject 2, and 77.5 cm for  
144 Subject 3.

145 Each stimulus was presented in 5–10 trials randomly amongst other stimuli with  
146 different frequency and/or amplitude levels. The stimulus frequency ranged from 6 Hz  
147 to 120 Hz, and the amplitude was between 1.25 times threshold to 7.5 times threshold.  
148 Within each trial, either one or two electrodes were randomly selected and stimulated;  
149 if two electrodes were selected, they were stimulated simultaneously. After delivering  
150 each stimulus and before moving to the subsequent trial, subjects were asked to trace  
151 the perceived shape on the touchscreen monitor. Shapes were closed by automatically  
152 connecting the first and last tracked fingertip location, after which a flood-fill was  
153 applied. The drawing data was recorded and converted into a binary shape data file using  
154 Matlab, and stored for future analysis. All psychophysical experiments were carried out  
155 by local field clinical engineers at each participating site, and the results were forwarded  
156 to the authors.

157 Since the validity and reliability of the experiment relied on the ability of our  
158 subjects to accurately draw the perceived phosphenes, a control task was conducted  
159 where subjects were asked to feel six different tactile shapes made of felt with a cardboard  
160 background, and then draw them on a touchscreen (Beyeler et al., 2019). As the shape of  
161 these tactile targets was known and we asked subjects to repeat each drawing five times,  
162 we were able to determine each subject's drawing error and bias. A detailed description  
163 of this task can be found in the Appendix S2 of Beyeler et al. (2019). In short, this  
164 control established baseline drawing variability for each subject, against which we could  
165 compare electrically elicited phosphene drawing variability to determine the stability of  
166 phosphene appearance.

### 167 *2.4. Phosphene shape descriptors*

Phosphene shape was quantified using four parameter-free shape descriptors commonly used in image processing: area, perimeter, major axis length, and minor axis length (Nanduri et al., 2008). An example is shown in Fig. 1. These descriptors

are based on a set of statistical quantities known as *image moments*. For an  $M \times N$  pixel grayscale image,  $I(x, y)$ , where  $x \in [1, M]$  and  $y \in [1, N]$ , the raw image moments  $M_{ij}$  were calculated as:

$$M_{ij} = \sum_x \sum_y x^i y^j I(x, y). \quad (1)$$

Raw image moments were used to compute area ( $A = M_{00}$ ) and the center of mass  $(\bar{x}, \bar{y}) = (M_{10}/M_{00}, M_{01}/M_{00})$  of each phosphene.

Phosphene major/minor axis lengths were calculated from the covariance matrix of the phosphene drawing:

$$\text{cov}[I(x, y)] = \begin{bmatrix} \mu'_{20} & \mu'_{11} \\ \mu'_{11} & \mu'_{02} \end{bmatrix}, \quad (2)$$

where  $\mu'_{20} = M_{20}/M_{00} - \bar{x}^2$ ,  $\mu'_{11} = M_{11}/M_{00} - \bar{x}\bar{y}$ , and  $\mu'_{02} = M_{02}/M_{00} - \bar{y}^2$ . The eigenvectors of this matrix corresponded to the major and minor axes of the image intensity.

Phosphene perimeter was calculated using an algorithm described in Benkrid et al. (2000), which approximates the length of each phosphene's contour as a line running through the centers of connected border pixels.

Phosphene orientation was previously shown to depend mostly on the retinal location of the stimulating electrode (Beyeler et al., 2019) and was thus excluded from the main analysis. However, the interested reader is referred to Appendix E for the supplemental analysis.

If a drawing had more than one phosphene, each shape descriptor was extracted for each perceived phosphene, summed over all phosphenes within a drawing (to account for a variable number of elicited phosphenes), and then averaged across trials.

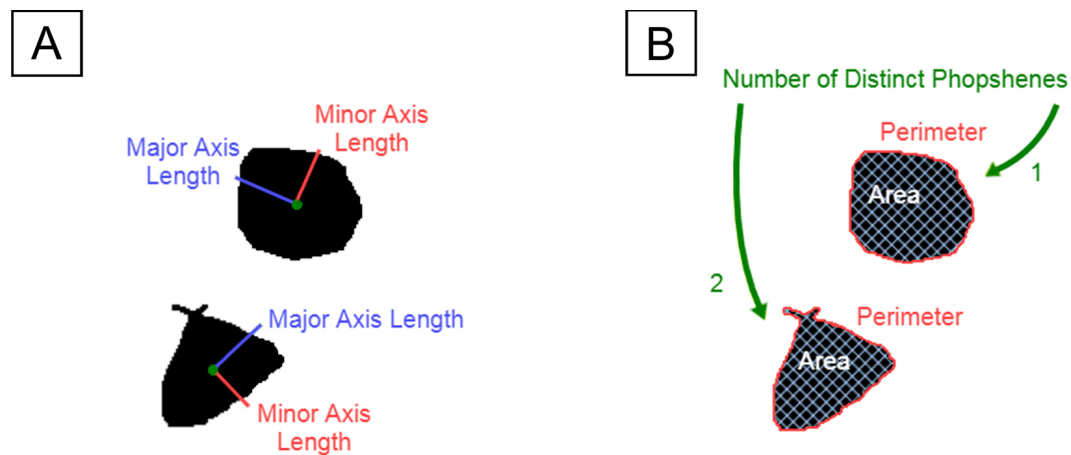

**Figure 1:** An example of a phosphene drawing and five shape properties of the phosphene. A) Phosphene described by major axis length (red) and minor axis length (blue). B) Phosphene described by area (white), perimeter (red), and the number of distinct regions (green).

183 2.5. Estimation of electrode-fovea distance and inter-electrode distance

184 Electrode-fovea distances and inter-electrode distances were estimated using the  
185 *pulse2percept* software (Beyeler et al., 2017). Following Beyeler et al. (2019), each  
186 subject's implant location was estimated based on the fundus images taken before and  
187 after surgery by extracting and analyzing retinal landmarks (e.g., foveal region and  
188 optic disc). Image pixels were converted into retinal distances using Argus II inter-  
189 electrode spacing information. The implant image was then rotated and transformed  
190 such that the raphe fell on the horizontal axis and the fovea was the origin of the  
191 new coordination system. The stimulated implant was placed on a simulated map of  
192 axonal nerve fiber bundles (Fig. 2), which was modeled based on 55 healthy subjects'  
193 ophthalmic fundus photographs (Jansonius et al., 2009). Since the fovea is the origin in  
194 the stimulated implant's coordinates, the electrode-fovea distance was measured as the  
195 distance between an electrode and the origin.

196 Inter-electrode distance measurements were adapted from Yücel et al. (2022) to  
197 investigate the effect of axonal stimulation on perceived phosphene shapes, in which the  
198 distance between two electrodes was divided into two, nearly orthogonal components:

- 199 • *between-axon* distance (green lines in Fig. 3): the shortest distance between the  
200 center of the more nasal electrode to the closest axon of the more temporal electrode;
- 201 • *along-axon* distance (blue curves in Fig. 3): the distance from the center of the  
202 temporal electrode, along the nasal electrode's closest axon, up to the point where  
203 the nasal electrode's between-axon line reached the temporal electrode's axon.

204 2.6. Estimation of electrode-retina distance

205 Electrode-retina distances were estimated from post-surgical OCT images collected  
206 with either Cirrus HD-OCT (Carl Zeiss Inc) or Topcon 3D-OCT 1000 (Topcon Inc).  
207 The SD-OCT scans were obtained 6 months after Subjects 1's and 2's implantation and

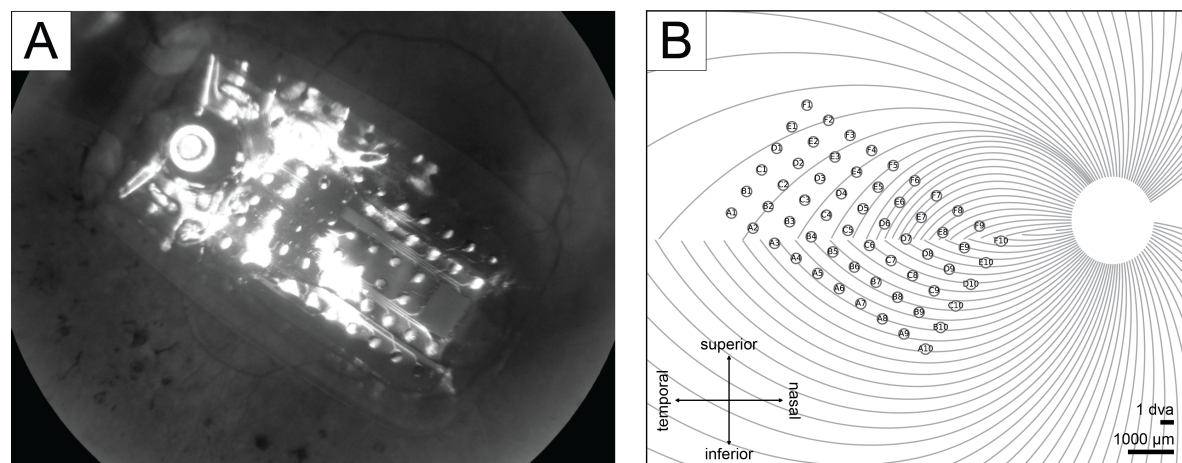

**Figure 2:** A) Subject 2's fundus image with Argus II implant placed over the retinal surface. B) Subject 2's simulated implant placed on the simulated axonal map.

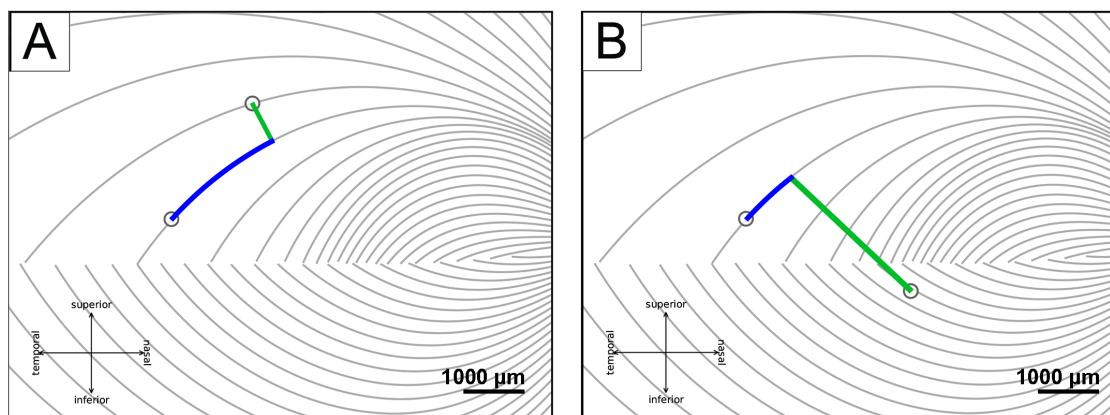

**Figure 3:** Axonal distances (adapted from Yücel et al., 2022). A) The between-axon distance (green line) and the along-axon distance (blue curve) when two electrodes are on the same side of the raphe, B) and when two electrodes are on different sides.

208 13 months after Subject 3’s implantation.

209 When performing OCT scanning, the opaque metal electrodes prevent image  
 210 acquisition directly underneath the corresponding electrode. However, based on the  
 211 length of the shadow between the electrode and the retinal surface, it is possible to  
 212 estimate the electrode-retina distance of that electrode (Ahuja et al., 2013). A single  
 213 grader manually measured the electrode-retina distance by counting the number of pixels  
 214 from the center of the shadow on the retinal pigment epithelium to the implant (Fig. 4)  
 215 and converting the pixel distances to microns. Distances of poorly imaged electrodes  
 216 were excluded from the dataset.

217 Details about each subject’s estimated electrode-fovea distances and electrode-  
 218 retina distances are given in Table 2. Welch’s *t*-test was used to compare subjects’  
 219 differences in stimulus and neuroanatomical parameters. There was no statistical  
 220 difference between the averaged electrode-fovea distance across different subjects (for  
 221 Subjects 1 and 2:  $t(29) = 1.529$ ,  $p > .05$ ; for Subjects 2 and 3:  $t(29) = 0.114$ ,  $p > .05$ ;  
 222 for Subjects 1 and 3:  $t(29) = -1.247$ ,  $p > .05$ ). In terms of electrode-retina distance,  
 223 Subject 1 had significantly larger values than the other two subjects ( $t(29) = 5.776$ ,  
 224  $p < .001$  and  $t(29) = 5.776$ ,  $p < .001$ ) whose implant was closely attached to the retina.

| Subject | Number of included electrodes | Electrode-fovea distance ( $\mu\text{m}$ ) | Electrode-retina distance ( $\mu\text{m}$ ) |
|---------|-------------------------------|--------------------------------------------|---------------------------------------------|
| 1       | 30                            | $2561.0 \pm 217.5$                         | $150.9 \pm 25.5$                            |
| 2       | 30                            | $2136.2 \pm 173.1$                         | 0.0                                         |
| 3       | 30                            | $2168.8 \pm 227.4$                         | 0.0                                         |

**Table 2:** Each subject’s number of sampled electrodes, electrode-fovea distance (mean  $\pm$  SEM), and electrode-retina distance (mean  $\pm$  SEM).



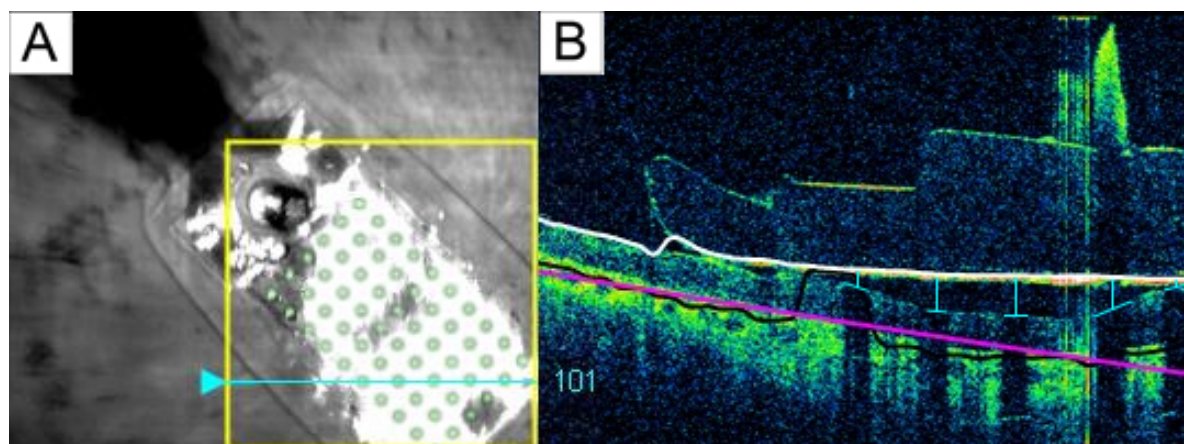

**Figure 4:** A) Subject 1's retinal implant fundus image. The cyan arrow marked the current scanning area, and the green electrode array was superimposed onto the original image for better electrode visualization. B) Subject 1's OCT b-scan. Each electrode-retina distance (vertical blue line) was represented by the length between the center of the shadow on the retinal surface (horizontal blue line) and the implant (white line).

## 225 2.7. Data cleaning

226 To make the collected phosphene drawings amenable to automated image analysis,  
227 we manually inspected all 4402 drawings to make sure that:

- 228 • all drawn contour lines were closed (e.g., when drawing a circle, the starting point  
229 of the drawing must touch the endpoint);
- 230 • small specs and other artifacts (most likely caused by accidentally touching the  
231 touchscreen) were not counted as additional phosphenes.

232 This procedure is explained in detail in Appendix B. Less than 1% of the 4402  
233 phosphene drawings were identified as needing to be cleaned, owing to the precision  
234 with which the original data was collected.

## 235 2.8. Statistical analysis

236 Data entry and statistical analyses were performed in Python (version 3.8.12,  
237 Python Software Foundation). Python package scikit-image (version 0.18.3, <https://scikit-image.org>)  
238 was used for calculating different phosphene shape properties,  
239 and matplotlib (version 3.5.0, <https://matplotlib.org>) was used for presenting  
240 phosphene drawings and analysis plots.

241 To facilitate the regression analyses as well as to control for individual drawing  
242 bias and variance (Beyeler et al., 2019), we standardized the data as follows. First, the  
243 dependent variables, which describe phosphene shape (i.e., area, perimeter, major/minor  
244 axis lengths) were expressed as multiples of the shape descriptors elicited by a  
245 “standard” pulse train (amplitude:  $2 \times$  threshold, frequency: 20 Hz). This procedure  
246 was performed separately for each subject, but considered drawings from all recorded

247 electrodes of that subject, in order to account for drawing bias and variance. For  
248 instance, the area of an individual phosphene was normalized by the phosphene area  
249 averaged across all drawings of a particular subject when one of their electrodes was  
250 stimulated with the standard pulse train. Second, shape descriptors were first extracted  
251 from each individual drawing, and then averaged across trials of the same electrode  
252 and stimulus combination, in order to eliminate repeated measures of the same data  
253 point. Third, all independent variables (i.e., amplitude, frequency, electrode-retina  
254 distance, electrode-fovea distance, between-axon distance, and along-axon distance)  
255 were standardized across all subjects. Data points that fell more than three standard  
256 deviations away from the mean were considered outliers and removed from all further  
257 analyses.

258 A series of multiple linear regression and partial correlation analyses were conducted  
259 both within and across subjects (Hou et al., 2023), aiming to answer three questions:

- 260 • whether the stimulus parameters and electrode-retina interface properties could  
261 affect the perceived shape in single-electrode stimulation,
- 262 • whether the significant predictors were consistent across single-electrode stimulation  
263 and paired-electrode stimulation, and
- 264 • whether the shapes of phosphenes elicited by single-electrode stimulation would  
265 add up linearly in paired-electrode stimulation.

266 **3. Results**

267 *3.1. Amplitude and frequency modulation affect single-point perception differently*

268 Consistent with the literature on single-electrode phosphene drawings (Nanduri  
269 et al., 2008; Luo et al., 2016; Beyeler et al., 2019), phosphene shape greatly varied across  
270 subjects and electrodes, but was relatively consistent across trials of a single electrode.  
271 Single-electrode stimulation reliably elicited phosphenes in all three participants, who  
272 reported seeing a single phosphene on 86.7% of trials, two phosphenes on 13.1% of  
273 trials, and three or more phosphenes on the remaining trials.

274 Fig. 5 shows the mean images for each electrode, obtained by averaging the drawings  
275 for each electrode across trials obtained with a particular current amplitude (Fig. 5 rows;  
276 expressed as a multiple of the threshold current). Mean images were then centered over  
277 the corresponding electrode in a schematic of the subject's implant to reveal the rich  
278 repertoire of elicited percepts across electrodes.

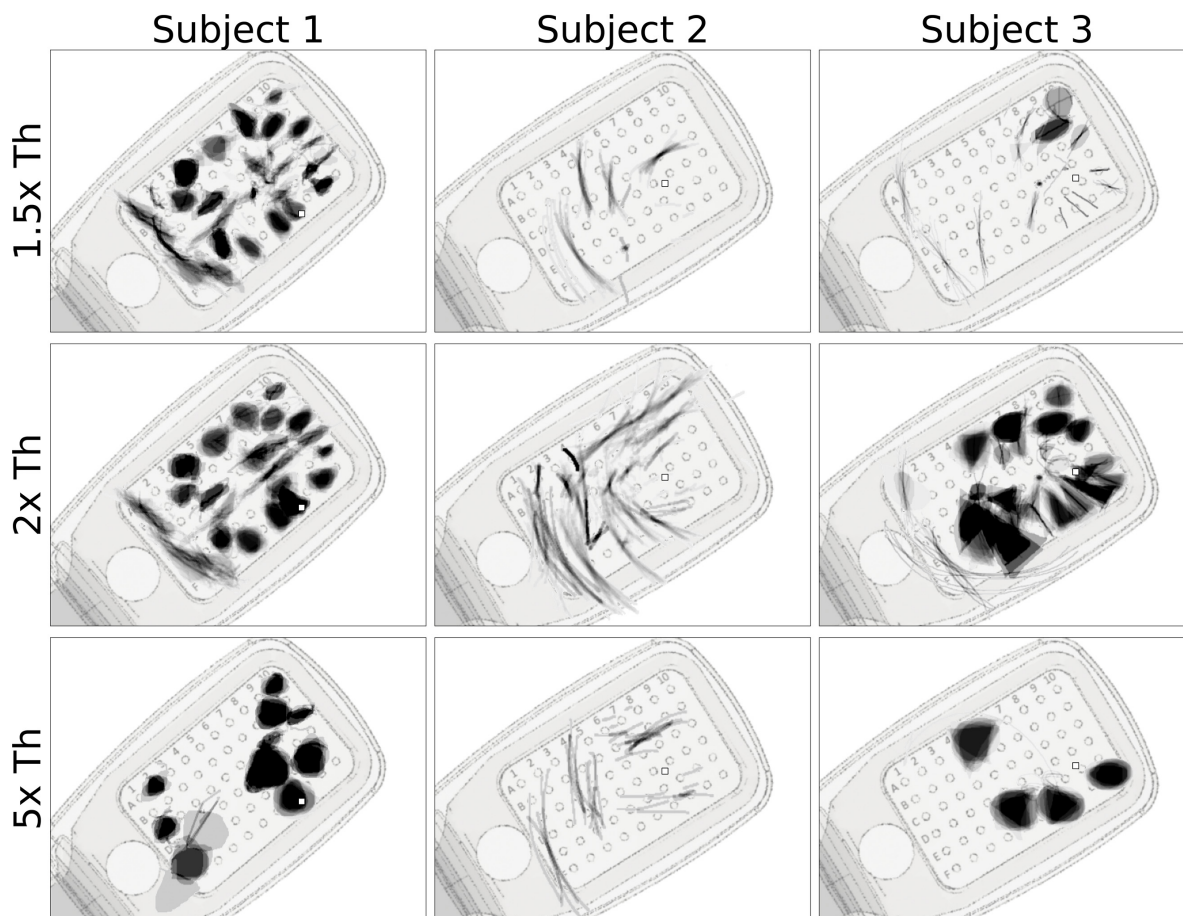

**Figure 5:** Single-electrode phosphene drawings as a function of stimulus amplitude (rows; expressed as multiples of the threshold current). Mean images were obtained by averaging drawings from individual trials aligned at their center of mass. Averaged drawings were then overlaid over the corresponding electrode in a schematic of each subject's implant. Pulse train frequency was 20 Hz for all subjects. Squares (□) indicate the estimated location of the fovea.

279 Whereas Subject 1 mostly drew blobs and wedges, which grew larger as the stimulus  
280 amplitude was increased, Subject 2 reported seeing exclusively lines and arcs, which got  
281 longer with increasing amplitude. The effect of amplitude on phosphene shape was most  
282 apparent for Subject 3, where phosphenes that appeared as lines and arcs near threshold  
283 turned into blobs and wedges as amplitude was increased.

284 First reported by Nanduri et al. (2012), pulse frequency seemed to affect phosphene  
285 shape differently than amplitude (Fig. 6). Across all three subjects, phosphenes grew  
286 larger and/or more elongated as the pulse frequency increased. Whereas phosphenes  
287 that were located close to the center of vision (denoted by  $\square$  in Fig. 6) did not noticeably  
288 change in shape, more eccentric phosphenes turned from blobs at 6 Hz to rectangles at  
289 60 Hz (Subject 1), or from short streaks at 6 Hz to orders-of-magnitude longer arcs at  
290 60 Hz (Subject 2).

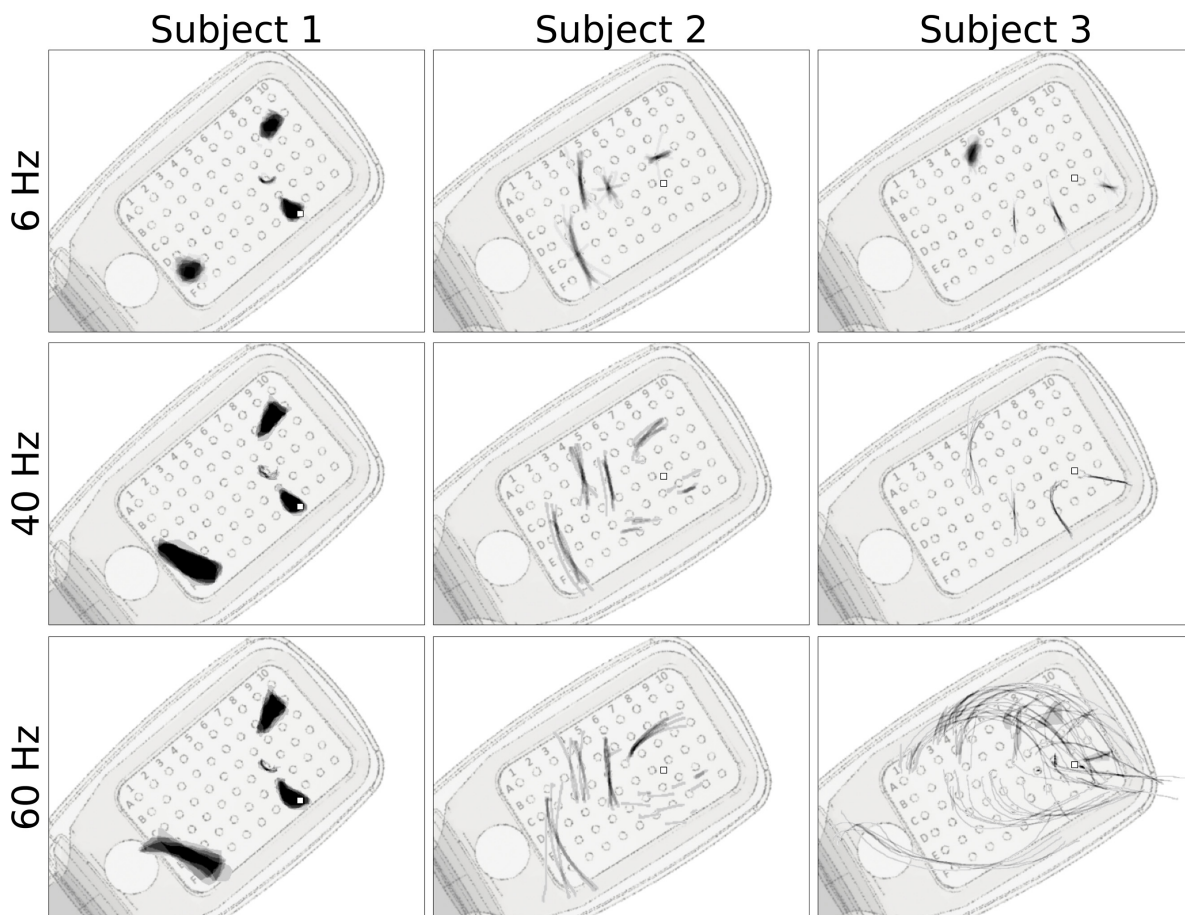

**Figure 6:** Single-electrode phosphene drawings as a function of pulse train frequency. Mean images were obtained by averaging drawings from individual trials aligned at their center of mass. These averaged drawings were then overlaid over the corresponding electrode in a schematic of each subject's implant. Shown are only those electrodes for which drawings at all stimulus frequencies were available. Stimulus amplitude was 1.5 times threshold for Subjects 1 and 2, and 1.25 times threshold for Subject 3. Squares ( $\square$ ) indicate the estimated location of the fovea.

291 3.2. Predicting two-point perception from single-point perception

292 When two electrodes were stimulated simultaneously, participants reported seeing  
 293 a single phosphene on 53.8% of trials, two phosphenes on 42.8% of trials, and three  
 294 or more phosphenes on the remaining trials. Three or more phosphenes were generally  
 295 encountered when single-electrode stimulation itself produced more than one phosphene.  
 296 Representative examples of phosphene drawings for different electrode pairs are shown  
 297 in Fig. 7, averaged across trials.

298 When paired-electrode stimulation produced two distinct phosphenes (Fig. 7, *left*),  
 299 their shape resembled the linear summation of the phosphenes reported during single-

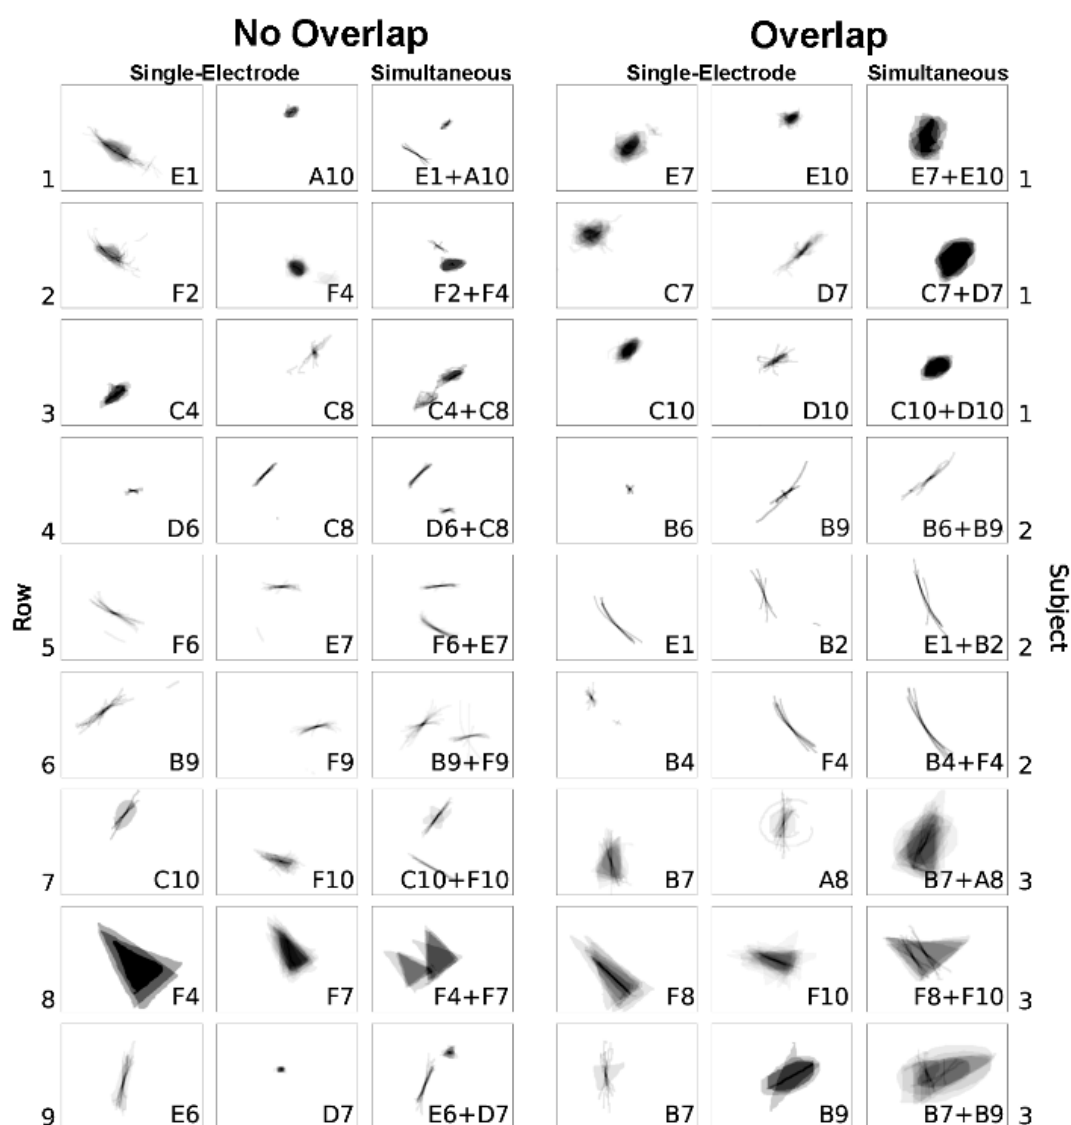

**Figure 7:** *Left:* Representative examples of single phosphenes combining linearly without overlap during paired-electrode stimulation. *Right:* Representative examples of phosphenes merging and overlapping during paired-electrode stimulation. Mean images were obtained by averaging drawings from individual trials aligned at their center of mass (see Appendix B5).

300 electrode stimulation. For instance, as shown in Row 1 of the left panel in Fig. 7,  
 301 Subject 1 perceived a long arc when electrode E1 was stimulated and an oval when  
 302 electrode A10 was stimulated. When both E1 and A10 were stimulated concurrently,  
 303 the resulting phosphene appeared as an arc alongside an oval. Similarly, in Row 9 of  
 304 the left panel, Subject 3 perceived a tilted line for electrode E6 and a small triangle for  
 305 electrode D7. Then during the simultaneous stimulation of electrodes E6 and D7, the  
 306 resulting shape preserved the original form of the individual phosphene shapes.

307 When paired-electrode stimulation produced a single phosphene (Fig. 7, *right*),  
 308 the phosphenes reported during single-electrode stimulation appeared to merge into a  
 309 unified shape. For instance, as shown in Row 2 of the right panel in Fig. 7, Subject  
 310 1 perceived a blob for electrode C7 and a right-leaning straight line for electrode D7.  
 311 When both C7 and D7 were stimulated simultaneously, the subject saw a larger blob  
 312 tilted rightward. Similarly, in Row 6, electrode B4 elicited a small dot, and electrode  
 313 F4 elicited a long arc; and simultaneous stimulation yielded an arc-shaped phosphene,  
 314 appearing as a cohesive shape formed by connecting the two individual shapes.

315 Naturally, we asked to what extent the phosphene shape elicited by paired-electrode  
 316 stimulation could be predicted by the phosphene shape elicited during single-electrode  
 317 stimulation. To answer this question, we conducted a simple linear regression (Table 3),  
 318 where each shape descriptor from a paired-electrode stimulation trial (e.g., the sum  
 319 of phosphene areas when Electrodes A and B were simultaneously stimulated) was  
 320 regressed on the same shape descriptor from a single-electrode stimulation trial (e.g.,  
 321 phosphene area elicited by Electrode A plus phosphene area elicited by Electrode B).  
 322 In short, we found that each paired-electrode shape descriptor could be predicted  
 323 by the sum of the two corresponding single-electrode shape descriptors (Table 3,  
 324  $p < .001$ ). Across all subjects, shape descriptors tended to sum linearly, with the  
 325  $\beta$  values suggesting that phosphenes elicited by paired-electrode stimulation appeared  
 326 larger than the average of their single-electrode counterparts, but smaller than their  
 327 sum.

| Single-electrode shape | Paired-electrode shape |             |                |             |                   |             |                   |             |                |             |
|------------------------|------------------------|-------------|----------------|-------------|-------------------|-------------|-------------------|-------------|----------------|-------------|
|                        | Area                   |             | Perimeter      |             | Major axis length |             | Minor axis length |             | Num phosphenes |             |
|                        | $\beta$                | $r$         | $\beta$        | $r$         | $\beta$           | $r$         | $\beta$           | $r$         | $\beta$        | $r$         |
| Area                   | <b>.630***</b>         | <b>.579</b> | -              | -           | -                 | -           | -                 | -           | -              | -           |
| Perimeter              | -                      | -           | <b>.611***</b> | <b>.733</b> | -                 | -           | -                 | -           | -              | -           |
| Major axis length      | -                      | -           | -              | -           | <b>.587***</b>    | <b>.722</b> | -                 | -           | -              | -           |
| Minor axis length      | -                      | -           | -              | -           | -                 | -           | <b>.675***</b>    | <b>.753</b> | -              | -           |
| Num phosphenes         | -                      | -           | -              | -           | -                 | -           | -                 | -           | <b>.647***</b> | <b>.288</b> |

**Table 3:** Linear regression and correlation analysis of paired-electrode shape descriptors predicted by the corresponding single-electrode shape descriptor (106 mean drawings).  $\beta$ : standardized regression coefficient.  $r$ : partial correlation coefficient. \*\*\*:  $p < .001$ . Significant effects are marked in bold. Intercepts were not included in the analysis, because if the value of a predictor (sum of the single-electrode phosphene shapes) was zero, the corresponding value of the dependent variable (the paired-electrode phosphene shape) should also be zero.

328 *3.3. Factors affecting phosphene appearance during single-electrode stimulation*

329 To more systematically investigate how different stimulus and anatomical  
330 parameters affect phosphene shape, we considered how the four shape descriptors  
331 (area, perimeter, major axis length, and minor axis length; see Methods, Section 2.4)  
332 could be predicted by different stimulus parameters (i.e., amplitude and frequency)  
333 and neuroanatomical parameters (i.e., electrode-retina distance and electrode-fovea  
334 distance). To address this, shape descriptor values were first averaged across trials and  
335 normalized per subject, then input to a multiple linear regression model (see Methods,  
336 Section 2.8).

337 The results are shown in Table 4 (for partial correlation plots, see Appendix F).  
338 Consistent with previous literature (Nanduri et al., 2012), we found that stimulus  
339 amplitude strongly affected phosphene area ( $\beta = .300$ ,  $p < .001$ ,  $r = .393$ ), and to  
340 a lesser degree minor axis length ( $\beta = .207$ ,  $p < .001$ ,  $r = .341$ ); suggesting that  
341 phosphenes get larger and blobbier with increasing amplitude. In contrast to Nanduri  
342 et al. (2012), we found that stimulus frequency also affected all four shape parameters  
343 (area:  $\beta = .120$ ,  $p < .05$ ,  $r = .129$ ; perimeter:  $\beta = .429$ ,  $p < .001$ ,  $r = .510$ ; major axis  
344 length:  $\beta = .596$ ,  $p < .001$ ,  $r = .515$ ; minor axis length:  $\beta = .301$ ,  $p < .001$ ,  $r = .373$ ).

345 In terms of neuroanatomical parameters, we considered an electrode's distance to  
346 the retina (i.e., height) and distance to the fovea (i.e., retinal eccentricity). We found  
347 that electrode-*retina* distance had a significant effect on phosphene area ( $\beta = .154$ ,  
348  $p < .001$ ,  $r = .274$ ) and minor axis length ( $\beta = .103$ ,  $p < .001$ ,  $r = .228$ ). However, due  
349 to data availability, this effect was solely based on the phosphene drawings of Subject  
350 1, as the electrode-retina distance was zero for all electrodes of the other two subjects.  
351 Interestingly, we also found that electrode-*fovea* distance had a small but significant  
352 effect on all four shape parameters, making more peripheral phosphenes generally larger  
353 (area:  $\beta = .174$ ,  $p < .001$ ,  $r = .326$ ; perimeter:  $\beta = .199$ ,  $p < .001$ ,  $r = .448$ ; minor axis  
354 length:  $\beta = .131$ ,  $p < .001$ ,  $r = .305$ ) and slightly longer (major axis length:  $\beta = .234$ ,  
355  $p < .001$ ,  $r = .395$ ; also see the bottom-right panel of Fig. 6).

356 As mentioned above, approximately 13% of single-electrode trials elicited multiple  
357 phosphenes. Multiple regression revealed that subjects were more likely to see multiple  
358 phosphenes as stimulus amplitude increased ( $\beta = .115$ ,  $r = .309$ ,  $p < .001$ ; rightmost  
359 column of Table 4).

360 Phosphene orientation was previously shown to depend mostly on the retinal  
361 location of the stimulating electrode (Beyeler et al., 2019) and was thus excluded from  
362 the main analysis (the interested reader is referred to Appendix E). The per-subject  
363 linear regression analyses are reported in Appendix D. Due to the limited sample size  
364 within each subject, readers should use these tables with caution.

365 *3.4. Factors affecting phosphene appearance during paired-electrode stimulation*

366 We wondered whether these stimulus and neuroanatomical parameters could also  
367 explain the shape of phosphenes elicited by paired-electrode stimulation. As subjects

368 would frequently draw multiple phosphenes during paired-electrode stimulation (Fig. 7),  
369 we extracted each shape descriptor for each individual phosphene. Then, we summed all  
370 phosphenes' corresponding shape descriptor within each drawing in order to account for  
371 the variable number of perceived phosphenes. Finally, we averaged each shape descriptor  
372 of each drawing across trials (see Methods, Section 2.8).

373 The results are shown in Table 5 and Fig. 8. Similar to the single-phosphene  
374 drawings, the average of stimulus amplitudes significantly increased the area ( $\beta = .289$ ,  
375  $p < .05$ ,  $r = .224$ ) and reduced major axis length ( $\beta = -.0542$ ,  $p < .05$ ,  $r = -.246$ ). All  
376 paired-electrode drawings were collected at 20 Hz, thus frequency could unfortunately  
377 not be included in the regression. The average of two stimulating electrodes' electrode-  
378 retina distances strongly increased phosphene area ( $\beta = 1.310$ ,  $p < .001$ ,  $r = .701$ ),  
379 perimeter ( $\beta = .0540$ ,  $p < .05$ ,  $r = .228$ ) and minor axis length ( $\beta = .407$ ,  $p < .001$ ,  
380  $r = .621$ ), thus making phosphenes larger and rounder. Moreover, the average of two  
381 electrode-fovea distances in an electrode pair was also a strong predictor of paired-  
382 electrode phosphene shape, leading to an increase in phosphene area ( $\beta = .273$ ,  $p < .05$ ,  
383  $r = .200$ ), perimeter ( $\beta = .0924$ ,  $p < .001$ ,  $r = .369$ ) and major axis length ( $\beta = .0882$ ,

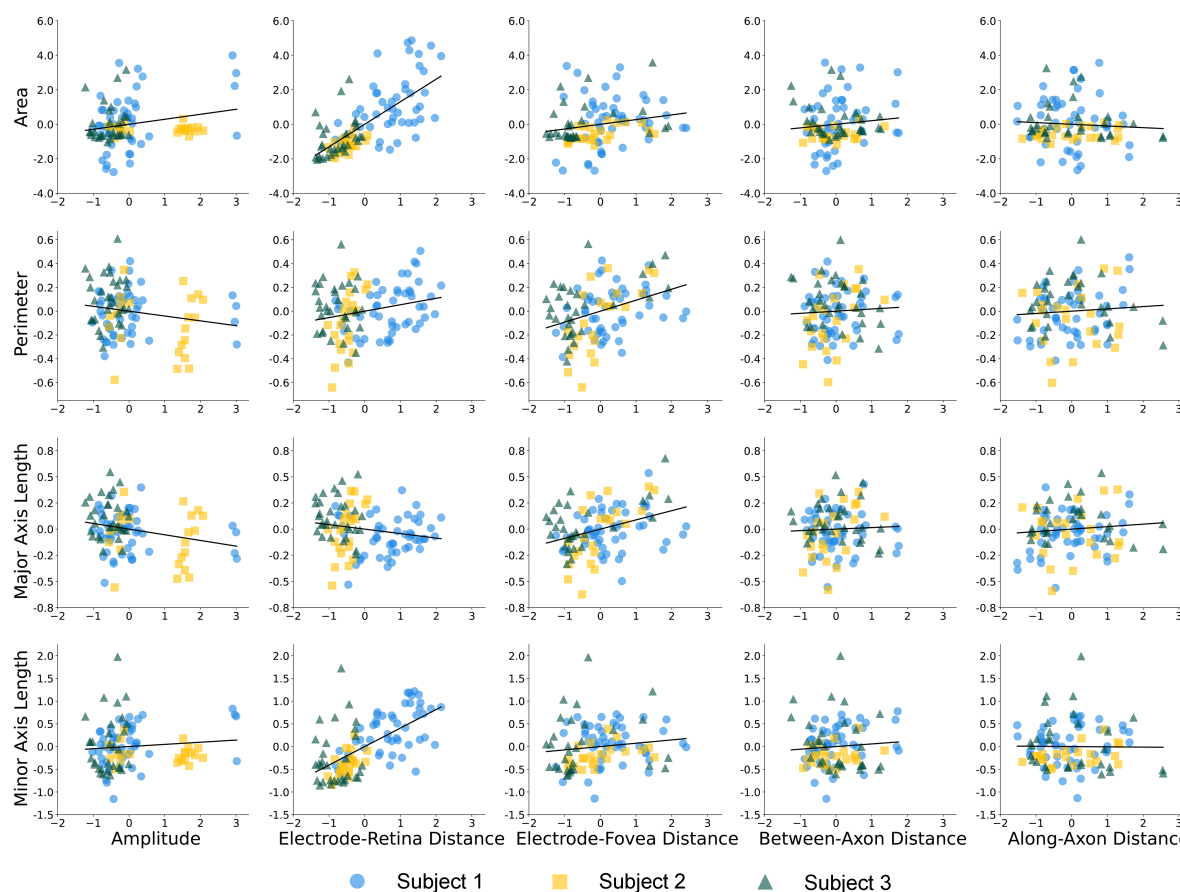

**Figure 8:** Partial correlation plots of normalized phosphene shape elicited by paired-electrode stimulation, correlated with standardized stimulus amplitude and neuroanatomical parameters (arbitrary units).



384  $p < .001$ ,  $r = .362$ ), but not minor axis length ( $p > .05$ ). In addition, subjects were more  
385 likely to report seeing two phosphenes with shorter electrode-fovea distances ( $\beta = -.133$ ,  
386  $p < .01$ ,  $r = -.294$ ).

387 In terms of the inter-electrode distance, Yücel et al. (2022) previously demonstrated  
388 that the probability of perceiving two distinct phosphenes increases with inter-electrode  
389 distance. However, the axon map model (Beyeler et al., 2019) makes a more nuanced  
390 prediction: subjects should be more likely to see two distinct phosphenes as the distance  
391 between two nerve fiber bundles increases (“between-axon” distance; as opposed to  
392 distance on the retinal surface). Under this model, paired-electrode stimulation with a  
393 short between-axon distance should activate the same nerve fiber bundles and thus lead  
394 to a single phosphene, even though the two electrodes may be far apart on the retina.

395 To test this hypothesis, we split retinal distance into two, almost orthogonal  
396 components (see Methods, Section 2.5): “between-axon” distance, which spreads the  
397 current radially from the more nasal electrode until it reaches the more temporal  
398 electrode’s closest axon, and “along-axon” distance, which walks along the axon from  
399 that point until it reaches the more temporal electrode (see Methods). This works even  
400 for pairs on opposite sides of the raphe (see Fig. 3). During the preliminary stage of  
401 this study, we experimented with a number of similar formulations of splitting these two  
402 components, and all of them gave similar results.

403 Consistent with the axon map model (Beyeler et al., 2019), we found that between-  
404 axon distance was a significant predictor of the number of perceived phosphenes  
405 ( $\beta = .162$ ,  $p < .05$ ,  $r = .257$ ; Table 5), but not along-axon distance ( $p > .05$ ).  
406 Interestingly, neither the between-axon nor the along-axon distance significantly affected  
407 the phosphene shape ( $p > .05$ ).

|                           | Area           |             | Perimeter      |             | Major axis length |             | Minor axis length |             | Number of phosphenes |             |
|---------------------------|----------------|-------------|----------------|-------------|-------------------|-------------|-------------------|-------------|----------------------|-------------|
|                           | $\beta$        | $r$         | $\beta$        | $r$         | $\beta$           | $r$         | $\beta$           | $r$         | $\beta$              | $r$         |
| Amplitude                 | <b>.300***</b> | <b>.393</b> | .0510          | .0919       | -.0404            | -.0534      | <b>.207***</b>    | <b>.341</b> | <b>.115***</b>       | <b>.309</b> |
| Frequency                 | <b>.120*</b>   | <b>.129</b> | <b>.429***</b> | <b>.510</b> | <b>.596***</b>    | <b>.515</b> | <b>.301***</b>    | <b>.373</b> | .0361                | .0774       |
| Electrode-retina distance | <b>.154***</b> | <b>.274</b> | .0185          | .0432       | -.0393            | -.0673      | <b>.103***</b>    | <b>.228</b> | -.0156               | -.0568      |
| Electrode-fovea distance  | <b>.174***</b> | <b>.326</b> | <b>.199***</b> | <b>.448</b> | <b>.234***</b>    | <b>.395</b> | <b>.131***</b>    | <b>.305</b> | -.0158               | -.0620      |

**Table 4:** Multiple regression and partial correlation analysis of single-electrode phosphene shape and numbers (255 mean drawings) predicted by amplitude, frequency, electrode-retina distance, and electrode-fovea distance. The variance inflation factor of all predictors was smaller than 1.5, suggesting minimal multicollinearity. \*:  $p < .05$ , \*\*:  $p < .01$ , \*\*\*:  $p < .001$ . Significant effects are marked in bold. Intercepts (not shown) were included in the analysis.

|                           | Area            |             | Perimeter       |             | Major axis length |              | Minor axis length |             | Number of phosphenes |              |
|---------------------------|-----------------|-------------|-----------------|-------------|-------------------|--------------|-------------------|-------------|----------------------|--------------|
|                           | $\beta$         | $r$         | $\beta$         | $r$         | $\beta$           | $r$          | $\beta$           | $r$         | $\beta$              | $r$          |
| Amplitude                 | <b>.289*</b>    | <b>.224</b> | -.0406          | -.182       | <b>-.0542*</b>    | <b>-.246</b> | .0475             | .0969       | -.0740               | -.179        |
| Electrode-retina distance | <b>1.310***</b> | <b>.701</b> | <b>.0540*</b>   | <b>.228</b> | -.0429            | -.187        | <b>.407***</b>    | <b>.621</b> | -.0713               | -.164        |
| Electrode-fovea distance  | <b>.273*</b>    | <b>.200</b> | <b>.0924***</b> | <b>.369</b> | <b>.0882***</b>   | <b>.362</b>  | .0731             | .140        | <b>-.133**</b>       | <b>-.294</b> |
| Between-axon distance     | .209            | .110        | .0182           | .0556       | .0146             | .0457        | .0580             | .0792       | <b>.162*</b>         | <b>.257</b>  |
| Along-axon distance       | -.0975          | -.0700      | .0192           | .0792       | .0237             | .100         | -.00605           | -.0112      | -.00548              | -.0122       |

**Table 5:** Multiple linear regression and partial correlation analysis of paired-electrode phosphene shapes and numbers (103 mean drawings) predicted by amplitude, electrode-retina distance, electrode-fovea distance, between-axon distance, and along-axon distance. On trials that elicited multiple phosphenes, factors and shape descriptors were first extracted for each individual phosphene, before being averaged. The variance inflation factor of all predictors was smaller than 1.5, suggesting minimal multicollinearity. \*:  $p < .05$ , \*\*:  $p < .01$ , \*\*\*:  $p < .001$ . Significant effects are marked in bold. Intercepts (not shown) were included in the analysis.

## 408 4. Discussion

409 In this study, we set out to investigate the relationship between single-point and  
410 two-point perception of Argus II users. Our results suggest that two-point perception  
411 can be predicted by the linear summation of single-point perception, supporting the  
412 notion of independent stimulation channels. We also found that the number of perceived  
413 phosphenes increased with the between-axon distance of two stimulating electrodes, but  
414 not the along-axon distance, thus providing further evidence in support of the axon map  
415 model for epiretinal stimulation (Rizzo et al., 2003; Nanduri, 2011; Beyeler et al., 2019).

416 These findings contribute to the growing literature on phosphene perception and  
417 have important implications for the design of future retinal prostheses.

### 418 4.1. Phosphene shape is well predicted by stimulus and neuroanatomical parameters

419 Although a link between electrode-retina distance and perceptual thresholds has  
420 been well established in the literature (Mahadevappa et al., 2005; de Balthasar et al.,  
421 2008; Ahuja et al., 2013; Pogoncheff et al., 2023), research examining the effect of  
422 electrode-retina distance on the *shape* of elicited phosphenes has been limited.

423 We found that phosphenes tended to appear larger and rounder as stimulus  
424 amplitude (and to a lesser degree, electrode-retina distance) increased (Table 4). This  
425 finding is consistent with previous considerations about current spread in the retina  
426 (de Balthasar et al., 2008; Granley and Beyeler, 2021; Yücel et al., 2022): as electrode-  
427 retina distance increases, larger currents are needed to activate the target neurons, which  
428 in turn activate larger areas of the retinal tissue.

429 In contrast to Nanduri et al. (2012), we found that stimulus frequency also affected  
430 phosphene size (Table 4 and Fig. 6). This discrepancy can potentially be explained  
431 by the fact that their 2012 analysis was limited to nine different electrodes from a  
432 single Argus I patient, whereas the current study sampled phosphenes from 90 different  
433 electrodes across three Argus II patients. Moreover, our results agree with data from  
434 suprachoroidal prostheses, where phosphenes tend to appear fuller (i.e., thicker or  
435 rounder) as the stimulation rate increases (Sinclair et al., 2016).

436 In addition, we found that electrode-fovea distance (i.e., retinal eccentricity)  
437 increased all four considered shape descriptors (area, perimeter, major/minor axis  
438 length; Table 4). This may simply be a consequence of ganglion cell receptive fields  
439 increasing with eccentricity (Curcio and Allen, 1990), which agrees with psychophysical  
440 (Freeman and Simoncelli, 2011; Stingl et al., 2013) and computational considerations  
441 (Song et al., 2022), but is an as-of-yet unpublished finding about the appearance of  
442 phosphenes elicited by retinal implants. Indeed, most phosphene models assume a  
443 constant scaling factor between retinal and visual field coordinates (Horsager et al.,  
444 2009; Nanduri, 2011; Beyeler et al., 2019).

445 *4.2. Two-point perception is the linear sum of single-point perception*

446 This study demonstrates that the phosphene shape in paired-electrode stimulation  
447 can be predicted by the stimulus and neuroanatomical parameters that describe the  
448 single-electrode phosphene shape (Table 5). However, there are some disparities between  
449 predictors for single-electrode and paired-electrode phosphenes. For example, stimulus  
450 amplitude significantly predicted the minor axis length in single-electrode stimulation,  
451 but not in paired-electrode stimulation. Electrode-fovea distance accounted for all four  
452 shape descriptors in single-electrode stimulation, but only significantly predicted three  
453 descriptors during paired-electrode stimulation. Such disparities indicate the presence  
454 of more complex mechanisms mediating the effect of each factor on phosphene shape  
455 during paired-electrode stimulation, which cannot be captured by a linear model.

456 On the perceptual level, we found that the shape of phosphenes elicited by paired-  
457 electrode stimulation was well predicted by the linear summation of the shape of  
458 their corresponding single-electrode phosphenes (Table 3), supporting the notion of  
459 independent channels for phosphene perception. Specifically,  $\beta$  values in Table 3  
460 suggested that phosphenes elicited by paired-electrode stimulation were smaller than the  
461 sum of their single-electrode counterparts. These findings are partially consistent with  
462 Christie et al. (2022), who showed that the phosphene elicited by electrode “quads” was  
463 similar to phosphenes elicited by individual electrodes that belonged to the quad, with  
464 Wilke et al. (2011a), who showed that single-electrode phosphenes consisting of round  
465 dots and lines added up to more complicated patterns when stimulated simultaneously,  
466 and with Barry et al. (2020), who reported that multi-electrode percepts in the Orion  
467 cortical implant were perceived to be smaller and simpler than the predicted combination  
468 of single-electrode phosphene shapes.

469 The observed linear summation of single-electrode phosphenes provides a valuable  
470 direction for future computational model development, particularly beneficial when  
471 predicting phosphenes in multi-electrode stimulation scenarios (Zrenner et al., 2010;  
472 Shivdasani et al., 2017). However, it should be noted that multiple phosphene patterns  
473 may not automatically group into perceptually intelligible objects (Stingl et al., 2015;  
474 Shivdasani et al., 2017; Christie et al., 2022). This “binding problem” (Roelfsema, 2023)  
475 also extends to cortical implants. Although a recent study with intracortical electrodes  
476 (Chen et al., 2020) showed that macaques could successfully identify the intended shape  
477 of a patterned electrical stimulus, human subjects implanted with the same technology  
478 could not always do that (Fernández et al., 2021). In contrast, human subjects implanted  
479 with cortical surface electrodes required a dynamic stimulation strategy to allow for  
480 perceptual grouping (Beauchamp et al., 2020).

481 *4.3. The number of perceived phosphenes depends on the axonal distance in*  
482 *paired-electrode stimulation*

483 We found that the number of perceived phosphenes tended to increase as the  
484 between-axon distance of two stimulating electrodes increased (Table 5). While it is

485 not surprising that two electrodes separated by a large retinal distance might produce  
486 two distinct phosphenes (Yücel et al., 2022), here we were able to split retinal distance  
487 into two (nearly orthogonal) components: between-axon distance, which measures how  
488 far the electric current must spread *away from* an axon bundle until it reaches another  
489 electrode, and along-axon distance, which measures how far the electric current must  
490 spread *along* an axon bundle until it reaches another electrode. Our results provide  
491 the first computational evidence that paired-electrode stimulation is more likely to  
492 elicit two distinct phosphenes as the distance between their underlying axon bundles  
493 increases. This provides further evidence in support of the axon map model for epiretinal  
494 stimulation (Rizzo et al., 2003; Nanduri, 2011; Beyeler et al., 2019).

#### 495 *4.4. Limitations and future work*

496 Despite the ability of our model to highlight important factors that guide the  
497 appearance of phosphenes elicited by retinal implants, it is important to note that  
498 our linear regression analyses cannot identify nonlinear predictors of phosphene shape.  
499 Future studies could thus focus on nonlinear (but still explainable) machine learning  
500 models (Pogoncheff et al., 2023). In addition, due to data availability, our analyses  
501 are currently limited to single- and paired-electrode stimulation. However, to achieve  
502 pattern vision, it will be important to stimulate more than two electrodes at a time.  
503 Therefore, future studies should investigate whether this linear summation can be  
504 extended to more than two electrodes.

#### 505 **Acknowledgments**

506 This work was supported by the National Eye Institute of the National Institutes of  
507 Health (R00-EY029329 to MB). The content is solely the responsibility of the authors  
508 and does not necessarily represent the official views of the National Institutes of Health.

#### 509 **Author contributions**

510 JDW and MB designed the study. DN collected the data. YH and JG processed the  
511 data. YH and MB analyzed the data and wrote the manuscript. All authors approved  
512 the final version of the manuscript.

#### 513 **Software and data availability**

514 The code to produce the figures and tables is publicly available at <https://github.com/bionicvisionlab/2023-ArgusPairs>. Data will be made publicly available via  
515 Open Science Framework upon acceptance of this article.  
516

## REFERENCES

22

### 517 References

- 518 Ahuja, A. K., Yeoh, J., Dorn, J. D., Caspi, A., Wuyyuru, V., McMahon, M. J.,  
519 Humayun, M. S., Greenberg, R. J., and Dacruz, L. (2013). Factors Affecting  
520 Perceptual Threshold in Argus II Retinal Prosthesis Subjects. *Transl Vis Sci Technol*,  
521 2(4):1.
- 522 Barry, M. P., Armenta Salas, M., Patel, U., Wuyyuru, V., Niketeghad, S., Bosking,  
523 W. H., Yoshor, D., Dorn, J. D., and Pouratian, N. (2020). Video-mode percepts are  
524 smaller than sums of single-electrode phosphenes with the Orion® visual cortical  
525 prosthesis. *Investigative Ophthalmology & Visual Science*, 61(7):927.
- 526 Beauchamp, M. S., Oswalt, D., Sun, P., Foster, B. L., Magnotti, J. F., Niketeghad, S.,  
527 Pouratian, N., Bosking, W. H., and Yoshor, D. (2020). Dynamic Stimulation of Visual  
528 Cortex Produces Form Vision in Sighted and Blind Humans. *Cell*, 181(4):774–783.e5.
- 529 Benkrid, K., Crookes, D., and Benkrid, A. (2000). Design and FPGA implementation  
530 of a perimeter estimator. In *Proceedings of the Irish Machine Vision and Image*  
531 *Processing Conference*, pages 51–57.
- 532 Beyeler, M. (2019). Commentary: Detailed Visual Cortical Responses Generated by  
533 Retinal Sheet Transplants in Rats With Severe Retinal Degeneration. *Frontiers in*  
534 *Neuroscience*, 13.
- 535 Beyeler, M., Boynton, G., Fine, I., and Rokem, A. (2017). pulse2percept: A Python-  
536 based simulation framework for bionic vision. In *Proceedings of the 16th Python in*  
537 *Science Conference*, pages 81–88, Austin, Texas. SciPy.
- 538 Beyeler, M., Nanduri, D., Weiland, J. D., Rokem, A., Boynton, G. M., and Fine, I.  
539 (2019). A model of ganglion axon pathways accounts for percepts elicited by retinal  
540 implants. *Scientific Reports*, 9(1):1–16.
- 541 Chen, X., Wang, F., Fernandez, E., and Roelfsema, P. R. (2020). Shape perception via a  
542 high-channel-count neuroprosthesis in monkey visual cortex. *Science*, 370(6521):1191–  
543 1196. Publisher: American Association for the Advancement of Science Section:  
544 Research Article.
- 545 Christie, B., Sadeghi, R., Kartha, A., Caspi, A., Tenore, F. V., Klatzky, R. L.,  
546 Dagnelie, G., and Billings, S. (2022). Sequential epiretinal stimulation improves  
547 discrimination in simple shape discrimination tasks only. *Journal of Neural*  
548 *Engineering*, 19(3):036033. Publisher: IOP Publishing.
- 549 Curcio, C. A. and Allen, K. A. (1990). Topography of ganglion cells in human retina.  
550 *J Comp Neurol*, 300(1):5–25.
- 551 da Cruz, L., Fynes, K., Georgiadis, O., Kerby, J., Luo, Y. H., Ahmado, A., Vernon, A.,  
552 Daniels, J. T., Nommiste, B., Hasan, S. M., Gooljar, S. B., Carr, A.-J. F., Vugler,  
553 A., Ramsden, C. M., Bictash, M., Fenster, M., Steer, J., Harbinson, T., Wilbrey,  
554 A., Tufail, A., Feng, G., Whitlock, M., Robson, A. G., Holder, G. E., Sagoo, M. S.,  
555 Loudon, P. T., Whiting, P., and Coffey, P. J. (2018). Phase 1 clinical study of an

## REFERENCES

23

- 556 embryonic stem cell–derived retinal pigment epithelium patch in age-related macular  
557 degeneration. *Nature Biotechnology*, 36(4):328–337.
- 558 de Balthasar, C., Patel, S., Roy, A., Freda, R., Greenwald, S., Horsager, A.,  
559 Mahadevappa, M., Yanai, D., McMahan, M. J., Humayun, M. S., Greenberg, R. J.,  
560 Weiland, J. D., and Fine, I. (2008). Factors Affecting Perceptual Thresholds in  
561 Epiretinal Prostheses. *Investigative ophthalmology & visual science*, 49(6):2303–2314.
- 562 Fernández, E., Alfaro, A., Soto-Sánchez, C., Gonzalez-Lopez, P., Lozano, A. M., Peña,  
563 S., Grima, M. D., Rodil, A., Gómez, B., Chen, X., Roelfsema, P. R., Rolston, J. D.,  
564 Davis, T. S., and Normann, R. A. (2021). Visual percepts evoked with an intracortical  
565 96-channel microelectrode array inserted in human occipital cortex. *The Journal of*  
566 *Clinical Investigation*, 131(23). Publisher: American Society for Clinical Investigation.
- 567 Foik, A. T., Lean, G. A., Scholl, L. R., McLelland, B. T., Mathur, A., Aramant, R. B.,  
568 Seiler, M. J., and Lyon, D. C. (2018). Detailed Visual Cortical Responses Generated  
569 by Retinal Sheet Transplants in Rats with Severe Retinal Degeneration. *Journal*  
570 *of Neuroscience*, 38(50):10709–10724. Publisher: Society for Neuroscience Section:  
571 Research Articles.
- 572 Freeman, J. and Simoncelli, E. P. (2011). Metamers of the ventral stream. *Nat Neurosci*,  
573 14(9):1195–1201.
- 574 Gasparini, S. J., Llonch, S., Borsch, O., and Ader, M. (2019). Transplantation of  
575 photoreceptors into the degenerative retina: Current state and future perspectives.  
576 *Progress in Retinal and Eye Research*, 69:1–37.
- 577 Granley, J. and Beyeler, M. (2021). A Computational Model of Phosphene Appearance  
578 for Epiretinal Prostheses. In *2021 43rd Annual International Conference of the IEEE*  
579 *Engineering in Medicine Biology Society (EMBC)*, pages 4477–4481. ISSN: 2694-0604.
- 580 Hamel, C. (2006). Retinitis pigmentosa. *Orphanet Journal of Rare Diseases*, 1(1):40.
- 581 Horsager, A., Boynton, G. M., Greenberg, R. J., and Fine, I. (2011). Temporal  
582 interactions during paired-electrode stimulation in two retinal prosthesis subjects.  
583 *Invest Ophthalmol Vis Sci*, 52(1):549–57.
- 584 Horsager, A., Greenwald, S. H., Weiland, J. D., Humayun, M. S., Greenberg, R. J.,  
585 McMahan, M. J., Boynton, G. M., and Fine, I. (2009). Predicting Visual Sensitivity  
586 in Retinal Prosthesis Patients. *Investigative Ophthalmology & Visual Science*,  
587 50(4):1483–1491.
- 588 Hou, Y., Nanduri, D., Granley, J., Weiland, J. D., and Beyeler, M. (2023). Phosphene  
589 shape elicited by paired-electrode stimulation is well predicted by single-electrode  
590 parameters for three Argus II users. *Investigative Ophthalmology & Visual Science*,  
591 64(8):4613.
- 592 Jansonius, N. M., Nevalainen, J., Selig, B., Zangwill, L. M., Sample, P. A., Budde,  
593 W. M., Jonas, J. B., Lagrèze, W. A., Airaksinen, P. J., Vonthein, R., Levin, L. A.,  
594 Paetzold, J., and Schiefer, U. (2009). A mathematical description of nerve fiber bundle

## REFERENCES

24

- 595 trajectories and their variability in the human retina. *Vision Research*, 49(17):2157–  
596 2163.
- 597 Luo, Y. H.-L. and da Cruz, L. (2016). The Argus® II Retinal Prosthesis System.  
598 *Progress in Retinal and Eye Research*, 50:89–107.
- 599 Luo, Y. H.-L., Zhong, J. J., Clemo, M., and da Cruz, L. (2016). Long-term Repeatability  
600 and Reproducibility of Phosphene Characteristics in Chronically Implanted Argus II  
601 Retinal Prosthesis Subjects. *American Journal of Ophthalmology*, 170:100–109.
- 602 Mahadevappa, M., Weiland, J., Yanai, D., Fine, I., Greenberg, R., and Humayun, M.  
603 (2005). Perceptual thresholds and electrode impedance in three retinal prosthesis  
604 subjects. *IEEE Transactions on Neural Systems and Rehabilitation Engineering*,  
605 13(2):201–206.
- 606 McGregor, J. E. (2019). Restoring vision at the fovea. *Current Opinion in Behavioral*  
607 *Sciences*, 30:210–216.
- 608 Nanduri, D. (2011). *Prosthetic vision in blind human patients: Predicting the percepts*  
609 *of epiretinal stimulation*. PhD thesis, University of Southern California, Los Angeles,  
610 CA.
- 611 Nanduri, D., Fine, I., Horsager, A., Boynton, G. M., Humayun, M. S., Greenberg, R. J.,  
612 and Weiland, J. D. (2012). Frequency and Amplitude Modulation Have Different  
613 Effects on the Percepts Elicited by Retinal Stimulation. *Investigative Ophthalmology*  
614 *& Visual Science*, 53(1):205–214.
- 615 Nanduri, D., Humayun, M. S., Greenberg, R. J., McMahon, M. J., and Weiland, J. D.  
616 (2008). Retinal prosthesis phosphene shape analysis. *Conference proceedings: ...*  
617 *Annual International Conference of the IEEE Engineering in Medicine and Biology*  
618 *Society. IEEE Engineering in Medicine and Biology Society. Annual Conference*,  
619 2008:1785–1788.
- 620 Oswalt, D., Bosking, W., Sun, P., Sheth, S. A., Niketeghad, S., Salas, M. A., Patel,  
621 U., Greenberg, R., Dorn, J., Pouratian, N., Beauchamp, M., and Yoshor, D.  
622 (2021). Multi-electrode stimulation evokes consistent spatial patterns of phosphenes  
623 and improves phosphene mapping in blind subjects. *Brain Stimulation: Basic,*  
624 *Translational, and Clinical Research in Neuromodulation*, 14(5):1356–1372. Publisher:  
625 Elsevier.
- 626 Pogoncheff, G., Hu, Z., Rokem, A., and Beyeler, M. (2023). Explainable Machine  
627 Learning Predictions of Perceptual Sensitivity for Retinal Prostheses. Pages:  
628 2023.02.09.23285633.
- 629 Rizzo, J. F., Wyatt, J., Loewenstein, J., Kelly, S., and Shire, D. (2003). Perceptual  
630 Efficacy of Electrical Stimulation of Human Retina with a Microelectrode Array  
631 during Short-Term Surgical Trials. *Investigative Ophthalmology & Visual Science*,  
632 44(12):5362–5369. Publisher: The Association for Research in Vision and  
633 Ophthalmology.



## REFERENCES

25

- 634 Roelfsema, P. R. (2023). Solving the binding problem: Assemblies form when neurons  
635 enhance their firing rate—they don't need to oscillate or synchronize. *Neuron*,  
636 111(7):1003–1019. Publisher: Elsevier.
- 637 Russell, S., Bennett, J., Wellman, J. A., Chung, D. C., Yu, Z.-F., Tillman, A., Wittes,  
638 J., Pappas, J., Elci, O., McCague, S., Cross, D., Marshall, K. A., Walshire, J., Kehoe,  
639 T. L., Reichert, H., Davis, M., Raffini, L., George, L. A., Hudson, F. P., Dingfield,  
640 L., Zhu, X., Haller, J. A., Sohn, E. H., Mahajan, V. B., Pfeifer, W., Weckmann, M.,  
641 Johnson, C., Gewaily, D., Drack, A., Stone, E., Wachtel, K., Simonelli, F., Leroy,  
642 B. P., Wright, J. F., High, K. A., and Maguire, A. M. (2017). Efficacy and safety of  
643 voretigene neparvovec (AAV2-hRPE65v2) in patients with RPE65-mediated inherited  
644 retinal dystrophy: a randomised, controlled, open-label, phase 3 trial. *The Lancet*,  
645 390(10097):849–860. Publisher: Elsevier.
- 646 Shivdasani, M. N., Sinclair, N. C., Gillespie, L. N., Petoe, M. A., Titchener, S. A., Fallon,  
647 J. B., Perera, T., Pardinas-Diaz, D., Barnes, N. M., Blamey, P. J., and for the Bionic  
648 Vision Australia Consortium (2017). Identification of Characters and Localization of  
649 Images Using Direct Multiple-Electrode Stimulation With a Suprachoroidal Retinal  
650 Prosthesis. *Investigative Ophthalmology & Visual Science*, 58(10):3962–3974.
- 651 Sinclair, N. C., Shivdasani, M. N., Perera, T., Gillespie, L. N., McDermott, H. J.,  
652 Ayton, L. N., and Blamey, P. J. (2016). The Appearance of Phosphenes Elicited  
653 Using a Suprachoroidal Retinal Prosthesis. *Investigative Ophthalmology & Visual  
654 Science*, 57(11):4948–4961.
- 655 Song, X., Qiu, S., Shivdasani, M. N., Zhou, F., Liu, Z., Ma, S., Chai, X., Chen, Y., Cai,  
656 X., Guo, T., and Li, L. (2022). An in-silico analysis of electrically-evoked responses  
657 of midget and parasol retinal ganglion cells in different retinal regions. *Journal of  
658 Neural Engineering*.
- 659 Stingl, K., Bartz-Schmidt, K. U., Besch, D., Chee, C. K., Cottrill, C. L., Gekeler,  
660 F., Groppe, M., Jackson, T. L., MacLaren, R. E., Koitschev, A., Kusnyerik, A.,  
661 Neffendorf, J., Nemeth, J., Naeem, M. A. N., Peters, T., Ramsden, J. D., Sachs, H.,  
662 Simpson, A., Singh, M. S., Wilhelm, B., Wong, D., and Zrenner, E. (2015). Subretinal  
663 Visual Implant Alpha IMS – Clinical trial interim report. *Vision Research*, 111:149–  
664 160.
- 665 Stingl, K., Bartz-Schmidt, K.-U., Gekeler, F., Kusnyerik, A., Sachs, H., and Zrenner,  
666 E. (2013). Functional Outcome in Subretinal Electronic Implants Depends on Foveal  
667 Eccentricity. *Investigative Ophthalmology & Visual Science*, 54(12):7658–7665.
- 668 Weiland, J. D., Walston, S. T., and Humayun, M. S. (2016). Electrical Stimulation of the  
669 Retina to Produce Artificial Vision. *Annual Review of Vision Science*, 2(1):273–294.
- 670 Wilke, R., Gabel, V.-P., Sachs, H., Bartz Schmidt, K.-U., Gekeler, F., Besch, D.,  
671 Szurman, P., Stett, A., Wilhelm, B., Peters, T., Harscher, A., Greppmaier, U., Kibbel,  
672 S., Benav, H., Bruckmann, A., Stingl, K., Kusnyerik, A., and Zrenner, E. (2011a).  
673 Spatial resolution and perception of patterns mediated by a subretinal 16-electrode

## REFERENCES

26

- 674 array in patients blinded by hereditary retinal dystrophies. *Invest Ophthalmol Vis*  
675 *Sci*, 52(8):5995–6003.
- 676 Wilke, R. G. H., Moghadam, G. K., Lovell, N. H., Suaning, G. J., and Dokos, S.  
677 (2011b). Electric crosstalk impairs spatial resolution of multi-electrode arrays in  
678 retinal implants. *Journal of Neural Engineering*, 8(4):046016. Publisher: IOP  
679 Publishing.
- 680 Yücel, E. I., Sadeghi, R., Kartha, A., Montezuma, S. R., Dagnelie, G., Rokem, A.,  
681 Boynton, G. M., Fine, I., and Beyeler, M. (2022). Factors affecting two-point  
682 discrimination in Argus II patients. *Frontiers in Neuroscience*, 16.
- 683 Zrenner, E., Bartz-Schmidt, K. U., Benav, H., Besch, D., Bruckmann, A., Gabel, V.-P.,  
684 Gekeler, F., Greppmaier, U., Harscher, A., Kibbel, S., Koch, J., Kusnyerik, A., Peters,  
685 T., Stingl, K., Sachs, H., Stett, A., Szurman, P., Wilhelm, B., and Wilke, R. (2010).  
686 Subretinal electronic chips allow blind patients to read letters and combine them to  
687 words. *Proceedings of the Royal Society B: Biological Sciences*, 278(1711):1489–1497.  
688 Publisher: Royal Society.

689 **Appendix A. Perceptual threshold measurements**

690 Custom software was used to measure the perceptual thresholds on each electrode  
691 using a yes-no procedure that was a hybrid between an adaptive staircase and a method  
692 of constant stimuli (de Balthasar et al., 2008). Stimuli were charge-balanced, 0.45 ms  
693 per phase, cathodic-first, biphasic 20 Hz pulse trains, 250 ms in duration.

694 The experiment consisted of five sessions, and each electrode was tested 12 times  
695 in each session, in random order. 32 catch trials were also interspersed randomly over  
696 five sessions to minimize the false alarm rate. Upon stimulation, subjects had to report  
697 whether they were able to see any phosphenes (detection task). Stimulus amplitudes  
698 (for stimulus present trials) for the first block were predetermined (method of constant  
699 stimuli). After the first block, a maximum likelihood algorithm fit of a Weibull function  
700 to the current data determined the range of the next block of stimulation amplitude  
701 values for each electrode. After each block, a confidence interval was acquired for each  
702 electrode using a Monte-Carlo simulation based on responses to the previous trials. If the  
703 confidence interval for an electrode fell below a pre-set level, trials for that electrode were  
704 no longer presented, but trials on the other electrodes continued through a maximum  
705 of five blocks.

706 Results were deemed unreliable if the false alarm rate, determined by the percentage  
707 that the subject saw a stimulus during catch trials, was greater than 20%. Data from  
708 runs with higher false alarm rates than 20% were removed from the analysis and the  
709 runs were repeated.

710 **Appendix B. Data cleaning**

711 *Appendix B.1. Phosphene drawings with open contour lines*

712 It was sometimes challenging for our subjects (who were completely blind) to draw  
713 fully closed circles, triangles, or wedges. Although a common strategy is to place  
714 one finger at the starting location while the other finger traces out the shape (thus  
715 simplifying the process of “returning home” and closing the contour), some drawings  
716 ended up with open contour lines (Fig. B1). These drawings were identified as follows:

- 717 • The drawing was either a hollow circle or triangle and either had a small gap  
718 between two endpoints (Panels A and B) or a line that resembled the shape of a  
719 circle or triangle (Panels C and D).
- 720 • The majority of drawings from the same electrode showed similarly shaped  
721 phosphenes which were all filled.

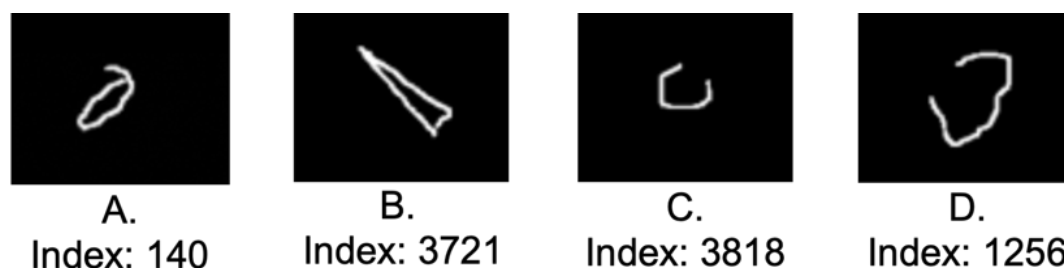

**Figure B1:** Examples of phosphene drawings with open contour lines.

722 Based on these criteria, we identified 21 (out of 4402) drawings that needed to be  
723 fixed. The data cleaning process involved three steps (Fig. B2):

- 724 (i) Identify the two endpoints of the drawing (Panel A).
- 725 (ii) Connect the two endpoints with a 1px-thick line (Panel B).
- 726 (iii) Fill the area with `scipy.ndimage.binary_fill_holes()` (Panel C).

727 *Appendix B.2. Phosphene drawings with broken contour lines*

728 Similarly, some phosphenes did have small gaps in otherwise smooth contour  
729 lines (most likely a tracking issue with the touchscreen). These small artifacts could

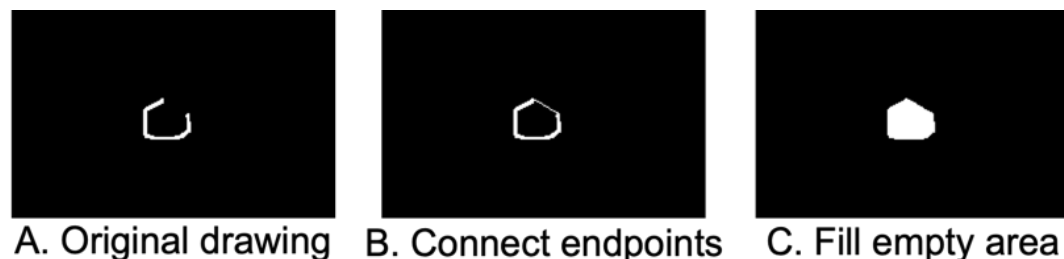

**Figure B2:** Procedure for fixing phosphene drawings with open contour lines.

## REFERENCES

29

730 potentially have grave effects on our phosphene shape analysis, as a gap in the contour  
731 line would accidentally double the number of reported phosphenes and halve their  
732 reported size.

733 Fortunately, we identified only twelve phosphene drawings with this issue. These  
734 drawings were identified by having a different number of phosphenes than drawings from  
735 other trials, caused by a small gap (on average approximately 10px wide; much smaller  
736 than the overall phosphene size). To fix them, we manually identified four endpoints of  
737 the broken contour line (Fig. B3, Panel A) and connected them (Panel B), then used  
738 `scipy.ndimage.binary_fill_holes()` to fill the area (Panel C).

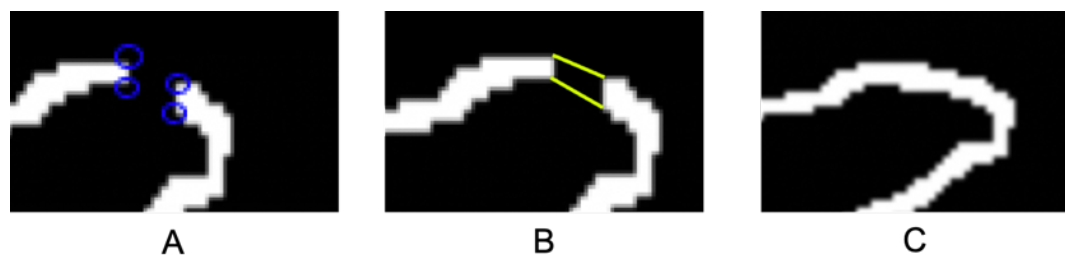

**Figure B3:** Procedure for fixing phosphene drawings with broken contour lines.

### 739 *Appendix B.3. Phosphene drawings with other artifacts*

740 Nine phosphene drawings had other artifacts, such as tiny specs (less than 20 pixels  
741 in size) that were not part of any other discernible shape, and were subsequently removed  
742 (Fig. B4).

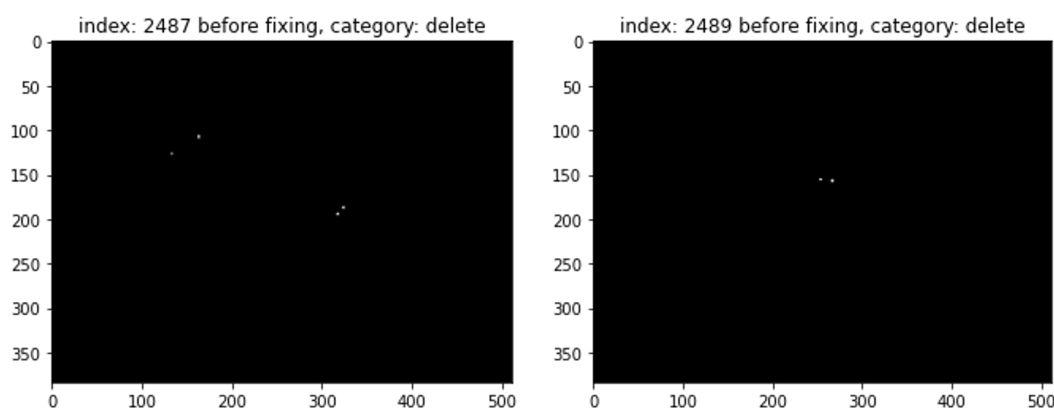

**Figure B4:** Example phosphene drawings with small specs (artifacts) that were removed from the dataset.

### 743 *Appendix B.4. Stacking and averaging phosphene drawings*

744 Cleaned phosphene drawings were grouped by subject, stimulating electrode(s),  
745 stimulus frequency(s), and stimulus amplitude(s); thus typically yielding a total of five

## REFERENCES

30

746 drawings from five trials per group.

747 We used the `measure` module of `scikit-image` to automatically extract the number  
748 of phosphenes (number of connected regions) and their corresponding centroids. To  
749 draw average phosphenes for a particular electrode (e.g., Fig. 5), phosphenes were  
750 aligned by their centroid and averaged, then aligned with the electrode location of  
751 the implant schematic. To predict the shape parameters with multiple linear regression  
752 (e.g., Table 4), we first calculated all shape parameters for each individual phosphene,  
753 and then averaged the values for the shape parameters (as opposed to extracting the  
754 shape parameters from the averaged phosphene drawing).

755 If all five trial drawings showed exactly one phosphene, alignment and averaging  
756 were straightforward. Of all five trial drawings showed exactly two phosphenes,  
757 phosphenes were assigned to electrodes by clustering their centroid locations:

- 758 • In drawing of Trial 1, label the phosphene with the smaller centroid location as the  
759 “first” phosphene, and the other as the “second”.
- 760 • In drawing of Trial 2, extract the centroid location of the first phosphene and  
761 compare it to the centroid locations from Trial 1. Assign it to the “first” or “second”  
762 phosphene depending on which centroid is closest. Repeat for the second phosphene.
- 763 • Repeat the process until all trials are done.

764 If the number of phosphenes varied across drawings from different trials, a more  
765 sophisticated procedure was necessary:

- 766 • Find the average centroid location of all single-phosphene drawings (Fig. B5, Panel  
767 A). In the paired-phosphene drawings, identify the phosphene that is closest to the  
768 average centroid location (“first phosphene centroid”).
- 769 • Find all phosphenes belonging to that centroid and average them (Panel B, “first  
770 averaged drawing”).
- 771 • Find all other phosphenes that have not been processed yet and average those  
772 (Panel C, “second averaged drawing”).

773 Note that all average drawings resulting from this process were manually examined  
774 to ensure the integrity of the process.

REFERENCES

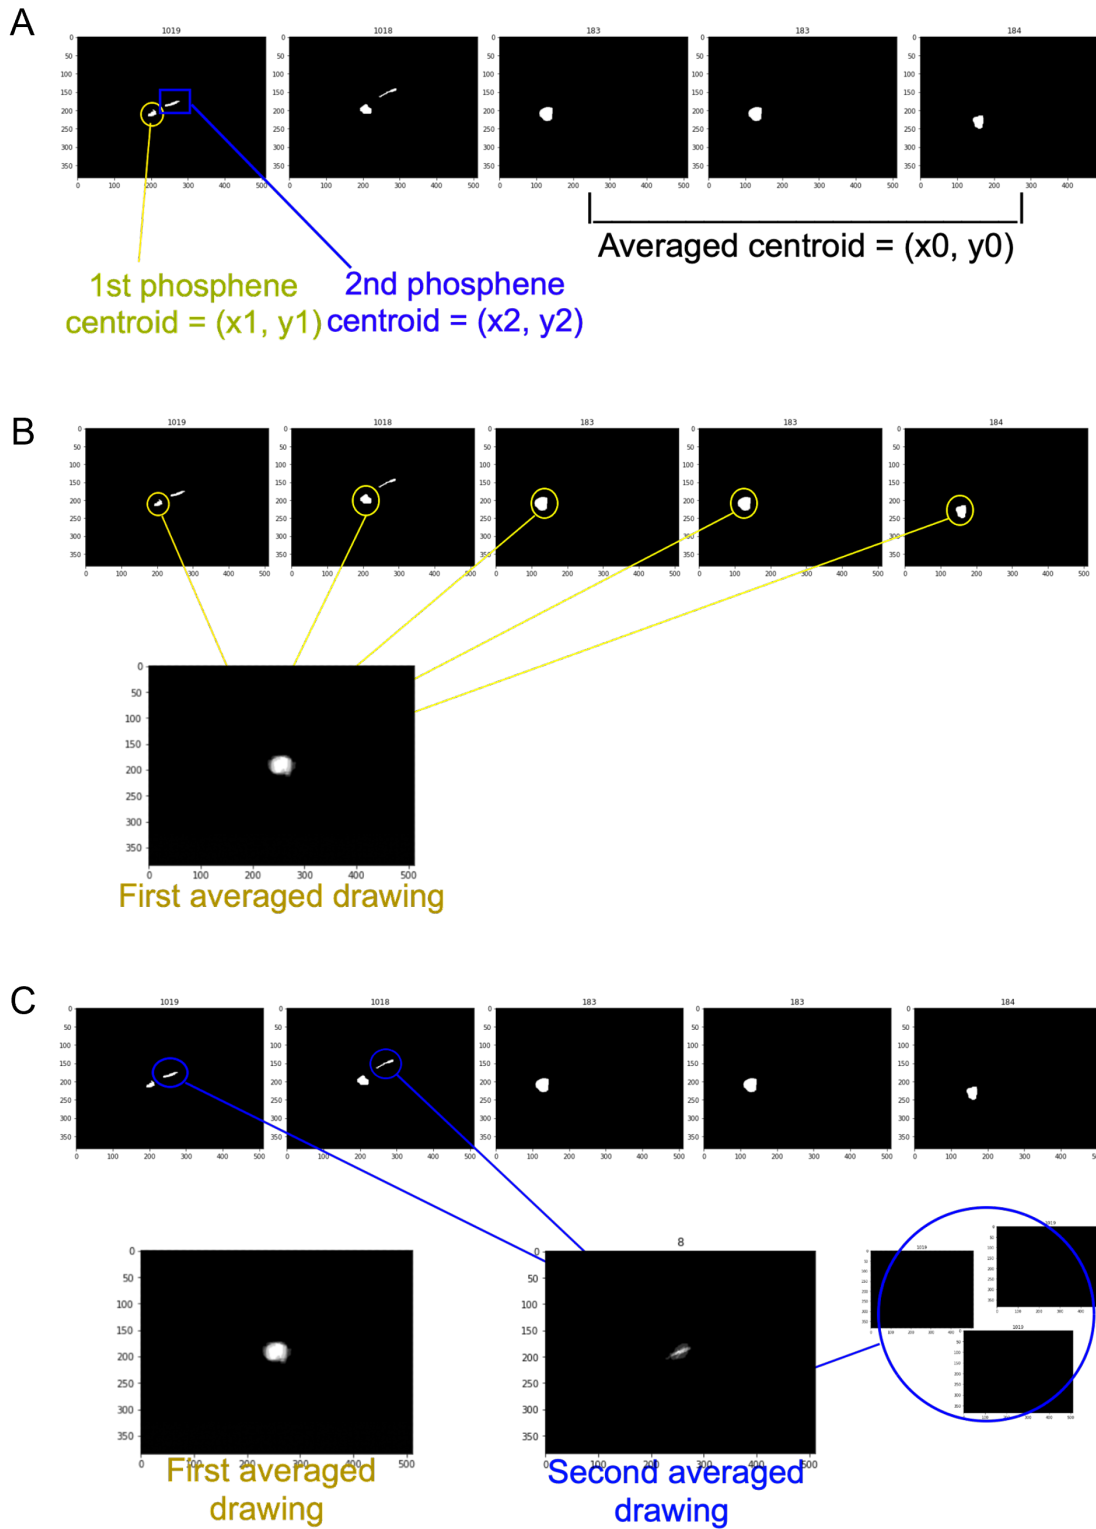

**Figure B5:** Procedure for stacking drawings with varying numbers of phosphenes.

775 **Appendix C. Distribution of phosphene shape descriptors**

776 Fig. C1 shows the distribution of shape descriptors.

777 Phosphene drawings were more consistent within than across subjects (for details,  
778 see Nanduri (2011); Beyeler et al. (2019)). In single-electrode stimulation, 1 tended to  
779 draw simple dots, oval and elongated lines varying in length and thickness (Fig. 5; *left*  
780 *column*). However, round, or oval shapes never appeared in Subject 2's drawings as all  
781 phosphenes were curved or straight lines (Fig. 5; *center column*), leading Subject 2's  
782 average phosphene areas, minor axis lengths, and perimeters to be much smaller than  
783 those of the other two subjects. This was also evident in the boxplots of each subject's  
784 phosphene shapes (Fig. C1; *top row*), because Subject 2's median area, minor axis  
785 length, and perimeter were even smaller than those of other subjects' 25th quantile.  
786 The drawings of Subject 3 (that included curved lines, ovals, and triangles) varied  
787 dramatically in shape across different electrodes. Similar tendencies were observed in  
788 paired-electrode stimulation (Fig. C1, *bottom row*).

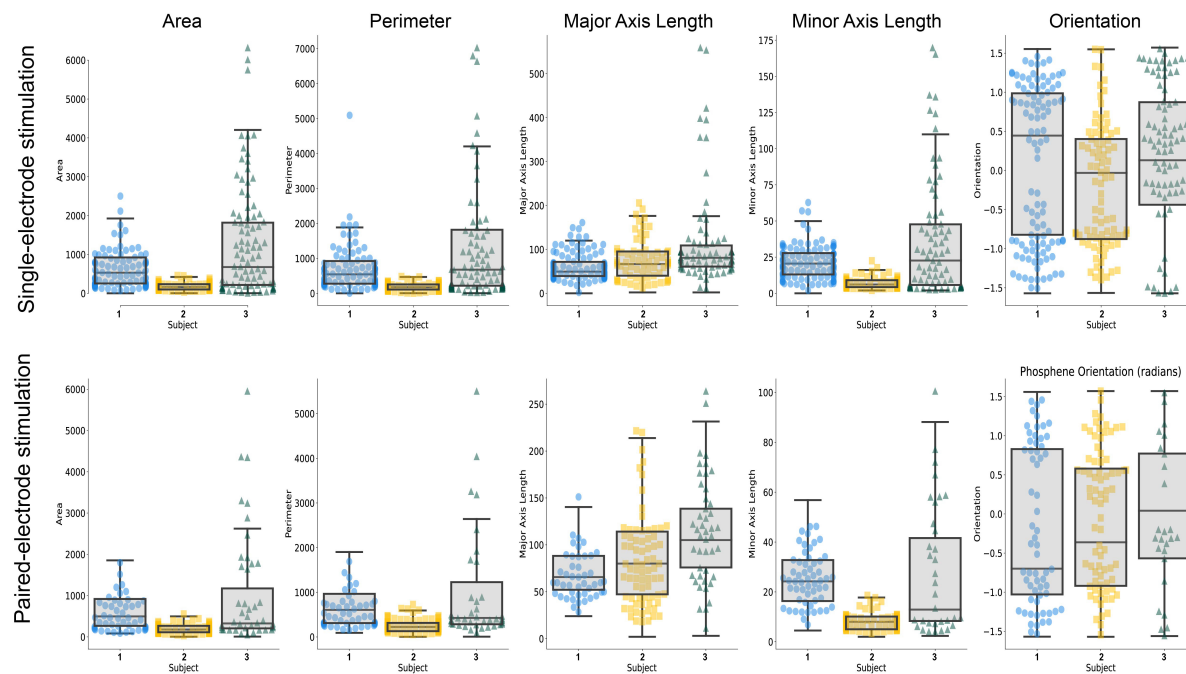

**Figure C1:** Boxplot of different phosphene shape properties for single-electrode stimulation (top row) and paired-electrode stimulation (bottom row).



REFERENCES

789 **Appendix D. Per-Subject analysis**

790 We systematically analyzed the phosphene shape and numbers in single- and paired-  
 791 electrode stimulation for each subject. Due to the small sample size, readers should view tables and use the information with caution.

|                            |                           | Area           |              | Perimeter      |             | Major axis length |             | Minor axis length |              | Number of phosphenes |              |
|----------------------------|---------------------------|----------------|--------------|----------------|-------------|-------------------|-------------|-------------------|--------------|----------------------|--------------|
|                            |                           | $\beta$        | $r$          | $\beta$        | $r$         | $\beta$           | $r$         | $\beta$           | $r$          | $\beta$              | $r$          |
| Subject 1<br>( $N = 102$ ) | Amplitude                 | <b>.406***</b> | <b>.469</b>  | <b>.0667*</b>  | <b>.234</b> | -.0159            | -.0499      | <b>.266***</b>    | <b>.564</b>  | .00566               | .0296        |
|                            | Frequency                 | <b>.468***</b> | <b>.345</b>  | <b>.117*</b>   | <b>.245</b> | <b>.114*</b>      | <b>.210</b> | .104              | .158         | -.0461               | -.143        |
|                            | Electrode-retina distance | <b>-.201*</b>  | <b>-.253</b> | -.0261         | -.0931      | -.0101            | -.0314      | <b>-.114**</b>    | <b>-.279</b> | <b>.0585**</b>       | <b>.291</b>  |
|                            | Electrode-fovea distance  | -.0646         | -.0830       | <b>.0848**</b> | <b>.288</b> | <b>.125***</b>    | <b>.360</b> | -.0751            | -.186        | .0355                | .180         |
| Subject 2<br>( $N = 69$ )  | Amplitude                 | <b>.0567*</b>  | <b>.266</b>  | <b>.113***</b> | <b>.457</b> | <b>.121***</b>    | <b>.477</b> | <b>.0707**</b>    | <b>.339</b>  | <b>.215***</b>       | <b>.519</b>  |
|                            | Frequency                 | .0927          | .197         | <b>.163**</b>  | <b>.314</b> | <b>.180**</b>     | <b>.339</b> | <b>.126*</b>      | <b>.277</b>  | <b>.320**</b>        | <b>.374</b>  |
|                            | Electrode-retina distance | -              | -            | -              | -           | -                 | -           | -                 | -            | -                    | -            |
|                            | Electrode-fovea distance  | <b>.166***</b> | <b>.635</b>  | <b>.162***</b> | <b>.602</b> | <b>.170***</b>    | <b>.614</b> | <b>.103***</b>    | <b>.473</b>  | -.0135               | -.0388       |
| Subject 3<br>( $N = 91$ )  | Amplitude                 | <b>.490***</b> | <b>.725</b>  | <b>.219*</b>   | <b>.268</b> | .0459             | .0437       | <b>.493***</b>    | <b>.522</b>  | .00787               | .0393        |
|                            | Frequency                 | .0488          | .117         | <b>.673***</b> | <b>.693</b> | <b>.930***</b>    | <b>.706</b> | <b>.506***</b>    | <b>.576</b>  | -.0149               | -.0833       |
|                            | Electrode-retina distance | -              | -            | -              | -           | -                 | -           | -                 | -            | -                    | -            |
|                            | Electrode-fovea distance  | <b>.0651*</b>  | <b>.244</b>  | <b>.346***</b> | <b>.619</b> | <b>.505***</b>    | <b>.654</b> | <b>.179***</b>    | <b>.369</b>  | <b>-.0269*</b>       | <b>-.234</b> |

**Table D1:** Multiple regression and partial correlation analysis of single-electrode phosphene shape and numbers predicted by amplitude, frequency, electrode-retina distance, and electrode-fovea distance. The variance inflation factor of all predictors was smaller than 2.  $\beta$ : standardized regression coefficient.  $r$ : partial correlation coefficient.  $N$ : number of mean drawings. -: data not available. \*:  $p < .05$ , \*\*:  $p < .01$ , \*\*\*:  $p < .001$ . Significant effects are marked in bold. Intercepts (not shown) were included in the analysis.

792

|                           |                           | Area           |              | Perimeter      |             | Major axis length |             | Minor axis length |             | Number of phosphenes |              |
|---------------------------|---------------------------|----------------|--------------|----------------|-------------|-------------------|-------------|-------------------|-------------|----------------------|--------------|
|                           |                           | $\beta$        | $r$          | $\beta$        | $r$         | $\beta$           | $r$         | $\beta$           | $r$         | $\beta$              | $r$          |
| Subject 1<br>( $N = 46$ ) | Amplitude                 | 1.300          | .292         | .158           | .280        | .0590             | .107        | <b>.439*</b>      | <b>.353</b> | -.150                | -.126        |
|                           | Electrode-retina distance | <b>.866*</b>   | <b>.363</b>  | <b>.101*</b>   | <b>.337</b> | .0365             | .126        | <b>.267**</b>     | <b>.403</b> | .0881                | .142         |
|                           | Electrode-fovea distance  | -.0843         | -.0384       | <b>.098*</b>   | <b>.331</b> | <b>.118*</b>      | <b>.385</b> | -.0700            | -.116       | .0338                | .0556        |
|                           | Between-axon distance     | .474           | .208         | .0285          | .0999       | -.00687           | -.0238      | <b>.203*</b>      | <b>.317</b> | <b>.327**</b>        | <b>.469</b>  |
|                           | Along-axon distance       | -.0640         | -.0451       | <b>.0653*</b>  | <b>.340</b> | .0554             | .290        | .0568             | .145        | .108                 | .266         |
| Subject 2<br>( $N = 22$ ) | Amplitude                 | .0225          | .109         | .0204          | .100        | .0224             | .110        | .00594            | .0355       | .0198                | .0504        |
|                           | Electrode-retina distance | -              | -            | -              | -           | -                 | -           | -                 | -           | -                    | -            |
|                           | Electrode-fovea distance  | <b>.217***</b> | <b>.716</b>  | <b>.217***</b> | <b>.722</b> | <b>.222***</b>    | <b>.729</b> | <b>.103*</b>      | <b>.512</b> | -.059                | -.145        |
|                           | Between-axon distance     | <b>.192*</b>   | <b>.566</b>  | <b>.192*</b>   | <b>.574</b> | <b>.193*</b>      | <b>.574</b> | <b>.179**</b>     | <b>.619</b> | .150                 | .270         |
|                           | Along-axon distance       | .113           | .374         | .104           | .354        | .100              | .342        | <b>.167**</b>     | <b>.593</b> | .116                 | .213         |
| Subject 3<br>( $N = 31$ ) | Amplitude                 | <b>.392*</b>   | <b>.409</b>  | .0647          | .353        | -.00471           | -.0264      | <b>.291**</b>     | <b>.482</b> | .0841                | .220         |
|                           | Electrode-retina distance | -              | -            | -              | -           | -                 | -           | -                 | -           | -                    | -            |
|                           | Electrode-fovea distance  | .110           | .0948        | <b>.110*</b>   | <b>.437</b> | <b>.142**</b>     | <b>.517</b> | -.00170           | -.00244     | <b>-.224*</b>        | <b>-.415</b> |
|                           | Between-axon distance     | <b>-.761*</b>  | <b>-.416</b> | -.0860         | -.255       | -.00197           | -.00581     | -.354             | -.332       | .170                 | .233         |
|                           | Along-axon distance       | .177           | .126         | -.0120         | -.0439      | -.0257            | -.0899      | .0173             | .0206       | -.187                | -.299        |

**Table D2:** Multiple linear regression and partial correlation analysis of paired-electrode phosphene shape and numbers predicted by amplitude, electrode-retina distance, electrode-fovea distance, between-axon distance, and along-axon distance. For trials that elicited multiple phosphenes, factors and shape descriptors were first extracted for each individual phosphene, before being averaged. The variance inflation factor of all predictors was smaller than 3. -: data not available. \*:  $p < .05$ , \*\*:  $p < .01$ , \*\*\*:  $p < .001$ . Significant effects are marked in bold. Intercepts (not shown) were included in the analysis.

REFERENCES

|                        | Area           |             | Perimeter      |             | Major axis length |             | Minor axis length |             | Number of phosphenes |              |
|------------------------|----------------|-------------|----------------|-------------|-------------------|-------------|-------------------|-------------|----------------------|--------------|
|                        | $\beta$        | $r$         | $\beta$        | $r$         | $\beta$           | $r$         | $\beta$           | $r$         | $\beta$              | $r$          |
| Subject 1 ( $N = 52$ ) | <b>.683***</b> | <b>.389</b> | <b>.597***</b> | <b>.555</b> | <b>.553***</b>    | <b>.720</b> | <b>.709***</b>    | <b>.554</b> | <b>0.627***</b>      | <b>0.314</b> |
| Subject 2 ( $N = 22$ ) | <b>.706***</b> | <b>.905</b> | <b>.708***</b> | <b>.903</b> | <b>.708***</b>    | <b>.903</b> | <b>.639***</b>    | <b>.646</b> | <b>0.568***</b>      | <b>0.389</b> |
| Subject 3 ( $N = 32$ ) | <b>.499***</b> | <b>.652</b> | <b>.535***</b> | <b>.673</b> | <b>.506***</b>    | <b>.592</b> | <b>.515***</b>    | <b>.589</b> | <b>0.755***</b>      | <b>0.492</b> |

**Table D3:** Linear regression and correlation analysis of paired-electrode stimulated shape predicted by electrode-electrode stimulated shape. \*:  $p < .05$ , \*\*:  $p < .01$ , \*\*\*:  $p < .001$ . Significant effects are marked in bold. Intercepts were not included in the analysis.

793 **Appendix E. Orientation analysis**

Phosphene orientation was also calculated from the covariance matrix of the phosphene drawing:

$$\text{cov}[I(x, y)] = \begin{bmatrix} \mu'_{20} & \mu'_{11} \\ \mu'_{11} & \mu'_{02} \end{bmatrix}, \quad (\text{E.1})$$

where  $m\mu'_{20} = M_{20}/M_{00} - \bar{x}^2$ ,  $\mu'_{11} = M_{11}/M_{00} - \bar{x}\bar{y}$ , and  $\mu'_{02} = M_{02}/M_{00} - \bar{y}^2$ . The eigenvectors of this matrix corresponded to the major and minor axes of the image intensity. Phosphene orientation could be extracted from the angle of the eigenvector associated with the largest eigenvalue towards the axis closest to this eigenvector:

$$\theta = \frac{1}{2} \arctan \left( \frac{2\mu'_{11}}{\mu'_{20} - \mu'_{02}} \right), \quad (\text{E.2})$$

794 which was valid as long as  $\mu'_{20} \neq \mu'_{02}$ , with  $\theta \in [-\pi/2, \pi/2]$ . To avoid division by zero,  
795 we manually assigned an angle of  $\theta = 0$  whenever  $\mu'_{20}$  was equal to  $\mu'_{02}$ .

796 Consistent with Beyeler et al. (2019), we found a significant correlation between  
797 the orientation of the nerve fiber bundle closest to the stimulating electrode and the  
798 orientation of the perceived phosphene (Table E1). This was true for both single-  
799 electrode and paired-electrode stimulation experiments ( $p < .01$ ; first two modules  
800 of Table E1). Moreover, the average of orientations in a paired-electrode stimulus  
801 could be predicted by the average orientations of the individual phosphenes measured  
802 during single-electrode stimulation ( $p < .001$ ; last module of Table E1), suggesting  
803 that the orientation of individual phosphenes did not change much during simultaneous  
804 stimulation.

REFERENCES

|              | Single-electrode elicited phosphene ATL |                | Paired-electrode elicited phosphene ATL |                           | Paired-electrode elicited phosphene ATL |             |                                                            |                |             |
|--------------|-----------------------------------------|----------------|-----------------------------------------|---------------------------|-----------------------------------------|-------------|------------------------------------------------------------|----------------|-------------|
|              | $\beta$                                 | $r$            | $\beta$                                 | $r$                       | $\beta$                                 | $r$         |                                                            |                |             |
| Subject 1    | Amplitude                               | <b>.283*</b>   | <b>.231</b>                             | Amplitude                 | .321                                    | .114        | Single-electrode elicited phosphene axonal tangential line | <b>.701***</b> | <b>.717</b> |
|              | Frequency                               | -.172          | -.0863                                  | Frequency                 | -                                       | -           |                                                            | <b>.604**</b>  | <b>.652</b> |
|              | Electrode-retina distance               | .221           | .181                                    | Electrode-retina distance | .391                                    | .272        |                                                            |                |             |
|              | Electrode-fovea distance                | .185           | .142                                    | Electrode-fovea distance  | .386                                    | .251        |                                                            |                |             |
|              | Axonal tangential line                  | <b>.392***</b> | <b>.364</b>                             | Axonal tangential line    | <b>.408**</b>                           | <b>.415</b> |                                                            |                |             |
|              | $N = 102$                               |                | $N = 48$                                |                           | $N = 52$                                |             |                                                            |                |             |
| Subject 2    | Amplitude                               | -.178          | -.227                                   | Amplitude                 | .102                                    | .109        | Single-electrode elicited phosphene axonal tangential line | <b>.604**</b>  | <b>.652</b> |
|              | Frequency                               | -.390          | -.221                                   | Frequency                 | -                                       | -           |                                                            |                |             |
|              | Electrode-retina distance               | -              | -                                       | Electrode-retina distance | -                                       | -           |                                                            |                |             |
|              | Electrode-fovea distance                | -.147          | -.154                                   | Electrode-fovea distance  | -.206                                   | -.224       |                                                            |                |             |
|              | Axonal tangential line                  | <b>.636***</b> | <b>.563</b>                             | Axonal tangential line    | <b>.704**</b>                           | <b>.655</b> |                                                            |                |             |
|              | $N = 69$                                |                | $N = 22$                                |                           | $N = 22$                                |             |                                                            |                |             |
| Subject 3    | Amplitude                               | .184           | .101                                    | Amplitude                 | -.156                                   | -.158       | Single-electrode elicited phosphene axonal tangential line | <b>.653***</b> | <b>.662</b> |
|              | Frequency                               | -.0841         | -.0518                                  | Frequency                 | -                                       | -           |                                                            |                |             |
|              | Electrode-retina distance               | -              | -                                       | Electrode-retina distance | -                                       | -           |                                                            |                |             |
|              | Electrode-fovea distance                | -.0300         | -.0297                                  | Electrode-fovea distance  | -.369                                   | -.356       |                                                            |                |             |
|              | Axonal tangential line                  | <b>.471***</b> | <b>.419</b>                             | Axonal tangential line    | <b>.535**</b>                           | <b>.509</b> |                                                            |                |             |
|              | $N = 91$                                |                | $N = 32$                                |                           | $N = 32$                                |             |                                                            |                |             |
| All Subjects | Amplitude                               | .0539          | .0396                                   | Amplitude                 | -.0876                                  | -.0869      | Single-electrode elicited phosphene axonal tangential line | <b>.675***</b> | <b>.685</b> |
|              | Frequency                               | -.131          | -.0732                                  | Frequency                 | -                                       | -           |                                                            |                |             |
|              | Electrode-retina distance               | -.0140         | -.0126                                  | Electrode-retina distance | -.0185                                  | -.0164      |                                                            |                |             |
|              | Electrode-fovea distance                | -.0387         | -.0390                                  | Electrode-fovea distance  | -.112                                   | -.111       |                                                            |                |             |
|              | Axonal tangential line                  | <b>.503***</b> | <b>.436</b>                             | Axonal tangential line    | <b>.502***</b>                          | <b>.469</b> |                                                            |                |             |
|              | $N = 255$                               |                | $N = 89$                                |                           | $N = 106$                               |             |                                                            |                |             |

**Table E1:** Phosphene numbers predicted by different stimuli and electrode-retina interface properties in single-electrode drawings and paired-electrode drawings, and phosphene numbers in paired-electrode drawings predicted by phosphene numbers in single-electrode drawings. The variance inflation factor of all predictors was smaller than 3. *ATL*: Axonal Tangential Line. \*:  $p < .05$ , \*\*:  $p < .01$ , \*\*\*:  $p < .001$ . Significant effects are marked in bold. Intercepts were not included in the analysis.

805 Appendix F. Partial correlation plots

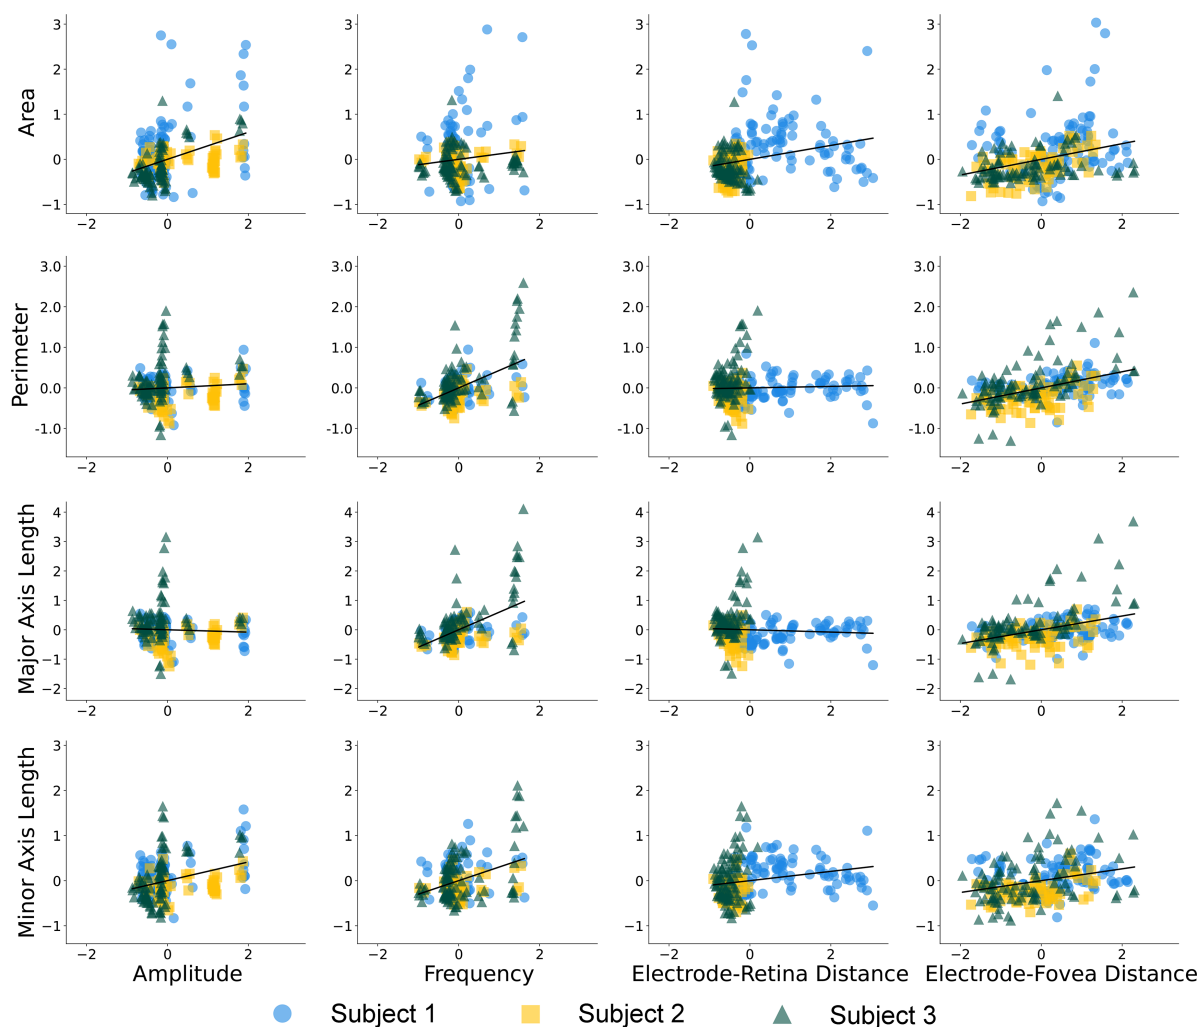

**Figure F1:** Partial correlation plots of area, perimeter, major axis length, or minor axis length correlated with amplitude, frequency, electrode-retina distance, and electrode-fovea distance across all subjects in single-electrode stimulation.

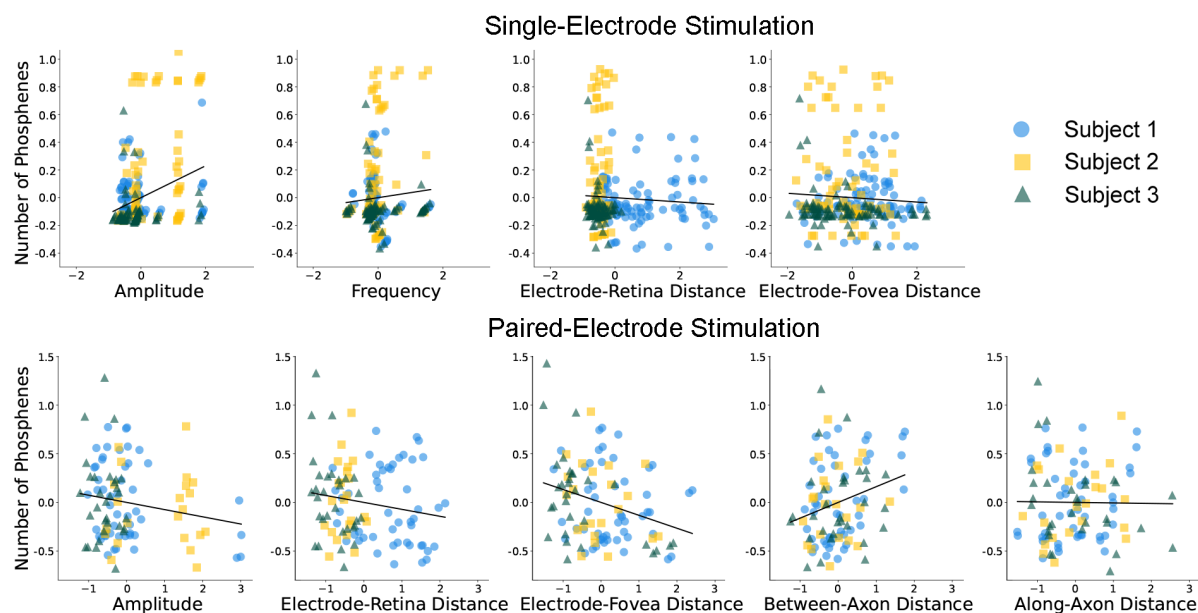

**Figure F2:** Partial correlation plots of the number of distinct phosphene regions correlated with stimulus parameters and electrode-retina properties across all subjects in single-electrode (first row) and paired-electrode (second row) stimulation.
